# Supplementary material for: Hydrogenation of unactivated enamines to tertiary amines: rhodium complexes of fluorinated phosphines give marked improvements in catalytic activity
Source: publisher site journal article supplement (doi:10.3762/bjoc.11.70), 2015-05-05

# Supporting Information

for

## **Hydrogenation of unactivated enamines to tertiary amines: rhodium complexes of fluorinated phosphines give marked improvements in catalytic activity**

Sergey Tin<sup>1</sup>, Tamara Fanjul<sup>2</sup> and Matthew L. Clarke<sup>1\*</sup>

Address: <sup>1</sup>School of Chemistry, University of St Andrews, EaStCHEM, St Andrews, KY16 9ST, Fife, UK, FAX +44 1334 463808 and <sup>2</sup>Chirotech Technology Centre, Dr. Reddy's Laboratories, Unit 410 Cambridge Science Park, Milton Road, Cambridge, CB4 0PE, UK

Email: Matthew L. Clarke - mc28@st-andrews.ac.uk

\*Corresponding author

### **Full details of substrate syntheses, product isolation and characterisation, along with NMR spectra of substrates and products**

#### General experimental techniques

All hydroaminovinylation / hydrogenation procedures were carried out under inert conditions using standard schlenk techniques, and all solvents used were dried and degassed. Synthetic procedures of enamines using TiCl<sub>4</sub> were carried out in dry solvents under a nitrogen atmosphere. Work-ups of these reactions, as well as isolation of amines, were carried out in air. All materials were used as received, unless otherwise stated.

[Rh(COD)Cl]<sub>2</sub> was prepared according to the literature procedure.<sup>1</sup> Ligands **7**<sup>2</sup> and **8**<sup>3</sup> were made by the literature procedures. Ligand **3** was prepared by the literature procedure using a

racemic mixture of the aromatic diol.<sup>4</sup> Other materials were purchased from Sigma-Aldrich or Acros and were used without further purification.

<sup>1</sup>H; <sup>13</sup>C; <sup>19</sup>F; <sup>1</sup>H,<sup>1</sup>H COSY; <sup>1</sup>H,<sup>13</sup>C HSQC and <sup>1</sup>H,<sup>13</sup>C HMBC NMRs were acquired on Bruker Avance 500 (500 MHz), Bruker Avance 400 (400 MHz) or Bruker 300 (300 MHz).

Mass spectrometry and high-resolution mass spectrometry were carried out by Mrs Caroline Horsburgh at the University of St Andrews.

Infrared spectra ( $\nu_{\max}$ ) were recorded on Shimadzu IRAffinity-1 using a Pike attenuated total reflectance (ATR) accessory. Only characteristic absorbances were assigned.

Elemental analyses were acquired by Mr. Stephen Boyer from London Metropolitan University.

### Synthetic procedures.

Synthesis of *N*-benzylpent-4-en-1-amine (prepared according to the literature procedure).<sup>5</sup>

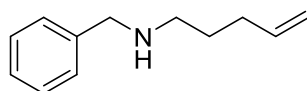

An ethanol solution (50 mL) of benzylamine (10.9 mL, 100 mmol), bromopentane (2.4 mL, 20.3 mmol) and sodium iodide (0.151 g, 1.01 mmol) was heated under reflux for 16 hours. After this time, the solvent was removed under the reduced pressure and dissolved in DCM (100 mL). The solution was washed with aqueous KOH (1 M, 50 mL), dried over KOH, filtered and solvent was removed under the reduced pressure. The product was purified by distillation under reduced pressure (90 °C, 1.5 mbar) to afford the desired product (2.036 g, 11.6 mmol, 57%) as a colourless liquid.

<sup>1</sup>H NMR (300 MHz, CDCl<sub>3</sub>, 298 K):  $\delta_{\text{H}} = 7.27 - 7.09$  (5H, m, Ar-H), 5.72 (1H, ddt, <sup>3</sup>*J*<sub>HH</sub> = 17.0 Hz, <sup>3</sup>*J*<sub>HH</sub> = 10.3 Hz, <sup>3</sup>*J*<sub>HH</sub> = 6.7 Hz, CH), 4.98 – 4.62 (2H, m, =CH<sub>2</sub>), 3.68 (2H, s, Ar-CH<sub>2</sub>), 2.55 (2H, t, <sup>3</sup>*J*<sub>HH</sub> = 7.3 Hz, N-CH<sub>2</sub>), 2.06 – 1.95 (2H, m, CH-CH<sub>2</sub>-), 1.51 (2H, qu, <sup>3</sup>*J*<sub>HH</sub> = 7.5 Hz, CH<sub>2</sub>), 1.16 (1H, br s, N-H).

<sup>13</sup>C{<sup>1</sup>H} NMR (75 MHz, CDCl<sub>3</sub>, 298 K):  $\delta_{\text{C}} = 141.1$  (s, <sup>Ar</sup>C), 139.0 (s, CH), 128.8 (s, <sup>Ar</sup>CH), 128.5 (s, <sup>Ar</sup>CH), 127.3 (s, <sup>Ar</sup>CH), 115.1 (s, =CH<sub>2</sub>), 54.5 (s, Ar-CH<sub>2</sub>), 49.4 (s, N-CH<sub>2</sub>), 32.0 (s, CH-CH<sub>2</sub>-), 29.8 (s, CH<sub>2</sub>).

MS (ES<sup>+</sup>) *m/z*: 176.12 ([MH]<sup>+</sup>, 100%).

**Enamine synthesis** (prepared according to the literature procedure).<sup>6</sup>

*N,N*-Diethyl-1-(pyridin-3-yl)ethenamine (**1a**)<sup>7</sup>

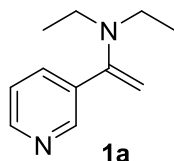

A hexane solution (100 mL) of 1-(pyridin-3-yl)ethan-1-one (4.0 mL, 36.4 mmol) and diethylamine (22.7 mL, 218 mmol) was cooled to 0 °C and TiCl<sub>4</sub> (2.2 mL, 20.1 mmol) was added dropwise and the resulting suspension was left to stir for further 30 minutes followed by stirring the reaction mixture at room temperature for further 24 hours. After this time, the flask was opened to air, the solution was filtered and volatiles were removed in vacuo.

The product was purified by Kugelrohr distillation (oven T = 95 °C, 1.5 mbar) to afford the desired enamine (1.002 g, 5.68 mmol, 16%) as a pale yellow liquid.

<sup>1</sup>H NMR (300 MHz, C<sub>6</sub>D<sub>6</sub>, 298 K): δ<sub>H</sub> = 8.58 (1H, d, <sup>4</sup>J<sub>HH</sub> = 2.2 Hz, N-<sup>Ar</sup>CH-<sup>Ar</sup>C), 8.43 (1H, dd, <sup>3</sup>J<sub>HH</sub> = 4.9 Hz, <sup>4</sup>J<sub>HH</sub> = 1.7 Hz, N-<sup>Ar</sup>CH-CH), 7.62 (1H, dt, <sup>3</sup>J<sub>HH</sub> = 7.8 Hz, <sup>4</sup>J<sub>HH</sub> = 2.1 Hz, <sup>Ar</sup>CH-<sup>Ar</sup>C), 7.14 (1H, dd, <sup>3</sup>J<sub>HH</sub> = 8.0 Hz, <sup>4</sup>J<sub>HH</sub> = 4.8 Hz, <sup>Ar</sup>CH), 4.10 (1H, s, one of C=CH<sub>2</sub>), 4.06 (1H, s, one of C=CH<sub>2</sub>), 2.88 (4H, q, <sup>3</sup>J<sub>HH</sub> = 7.1 Hz, 2 x CH<sub>2</sub>-CH<sub>3</sub>), 0.93 (6H, t, <sup>3</sup>J<sub>HH</sub> = 7.1 Hz, 2 x CH<sub>3</sub>).

<sup>13</sup>C NMR (75 MHz, CDCl<sub>3</sub>, 298 K): δ<sub>C</sub> = 152.0 (s, N-C), 149.5 (s, N-<sup>Ar</sup>CH-<sup>Ar</sup>C), 149.2 (s, N-<sup>Ar</sup>CH), 136.8 (s, <sup>Ar</sup>C), 135.2 (s, <sup>Ar</sup>C-<sup>Ar</sup>CH), 123.2 (s, <sup>Ar</sup>CH), 92.5 (s, C=CH<sub>2</sub>), 45.4 (s, N-CH<sub>2</sub>), 11.9 (s, CH<sub>3</sub>).

MS (ES<sup>+</sup>) *m/z*: 177.11 ([MH]<sup>+</sup>, 100%), 149.12 ([M - C<sub>2</sub>H<sub>5</sub>]<sup>+</sup>, 15).

(**1b**)

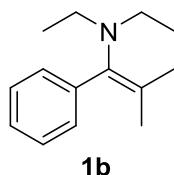

A hexane solution (100 mL) of 2-methyl-1-phenylpropan-1-one (5.0 mL, 33.3 mmol) and diethylamine (21.0 mL, 202 mmol) was cooled to 0 °C and TiCl<sub>4</sub> (2.0 mL, 18.2 mmol) was added dropwise and the resulting suspension was left to stir for further 30 minutes followed by stirring the reaction mixture at room temperature for further 24 hours. After this time, the flask was opened to air and water-saturated diethyl ether (20 mL) was added. The solution

was filtered and volatiles were removed in vacuo. Crude enamine was dissolved in toluene (150 mL), extracted into aqueous HCl (1 M, 3 × 100 mL) and the combined acidic fractions were basified with aqueous NaOH (1 M) until pH 10–12. The enamine was then extracted into ethyl acetate (3 × 70 mL), the combined organic fractions were washed with water (50 mL) and brine (50 mL), dried over MgSO<sub>4</sub> and solvent was removed under reduced pressure. The enamine was dried in vacuo for 2 hours to afford the desired product (2.848 g, 14.0 mmol, 42%) as a pale yellow liquid.

Due to high stability of this enamine, it was found that acid-base work-up is a suitable method of purifying enamines with tetrasubstituted double bond studied in this paper (another example is enamine **1c**).

<sup>1</sup>H NMR (400 MHz, C<sub>6</sub>D<sub>6</sub>, 298 K): δ<sub>H</sub> = 7.23 – 7.17 (2H, m, Ar-H), 7.16 – 7.07 (3H, m, Ar-H), 2.61 (4H, q, <sup>3</sup>J<sub>HH</sub> = 7.1 Hz, 2 x CH<sub>2</sub>), 1.96 (3H, s, C-CH<sub>3</sub>), 1.58 (3H, s, C-CH<sub>3</sub>), 1.03 (6H, t, <sup>3</sup>J<sub>HH</sub> = 7.1 Hz, 2 x CH<sub>2</sub>-CH<sub>3</sub>).

<sup>13</sup>C{<sup>1</sup>H} NMR (101 MHz, CDCl<sub>3</sub>, 298 K): δ<sub>C</sub> = 140.9 (s, N-C), 138.1 (s, Ar-C), 130.1 (s, Ar-CH), 127.5 (s, Ar-CH), 126.7 (s, C-(CH<sub>3</sub>)<sub>2</sub>), 126.3 (s, Ar-CH), 47.1 (s, N-CH<sub>2</sub>), 21.0 (s, C-CH<sub>3</sub>), 20.0 (s, C-CH<sub>3</sub>), 14.2 (s, CH<sub>2</sub>-CH<sub>3</sub>).

MS (ES<sup>+</sup>) *m/z*: 204.17 ([MH]<sup>+</sup>, 100%); Found(ES<sup>+</sup>) 204.1742 ([MH]<sup>+</sup>), C<sub>14</sub>H<sub>22</sub>N<sup>+</sup> requires 204.1747.

IR (neat) ν, cm<sup>-1</sup>: 2968, 2820, 1489, 1441, 1375, 1219, 1109, 1072.

(**1c**)

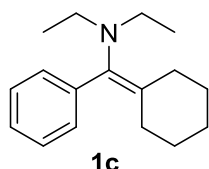

A hexane solution (90 mL) of cyclohexyl(phenyl)methanone (4.911 g, 26.1 mmol) and diethylamine (16.5 mL, 159 mmol) was cooled to 0 °C and TiCl<sub>4</sub> (1.6 mL, 14.6 mmol) was added dropwise and the resulting suspension was left to stir for further 30 minutes followed by stirring the reaction mixture at room temperature for further 24 hours. After this time, the flask was opened to air and water-saturated diethyl ether (16 mL) was added. The solution

was filtered and volatiles were removed in vacuo. Crude enamine was dissolved in toluene (120 mL), extracted into aqueous HCl (1 M, 3 × 80 mL) and the combined acidic fractions were basified with aqueous NaOH (1 M) until pH 10–12. The enamine was then extracted into ethyl acetate (3 × 50 mL), the combined organic fractions were washed with water (40 mL) and brine (40 mL), dried over MgSO<sub>4</sub> and solvent was removed under reduced pressure. The enamine was dried in vacuo for 2 hours to afford the desired product (3.811 g, 15.7 mmol, 60%) as viscous pale yellow oil.

Anal. Calcd. for C<sub>17</sub>H<sub>25</sub>N (found): C, 83.89 (83.74); H, 10.35 (10.28); N, 5.75 (5.96).

<sup>1</sup>H NMR (400 MHz, C<sub>6</sub>D<sub>6</sub>, 298 K): δ<sub>H</sub> = 7.24 – 7.08 (5H, m, Ar-H), 2.64 – 2.57 (6H, m, 2 x N-CH<sub>2</sub> and one -CH<sub>2</sub>), 2.07 – 2.02 (2H, m, CH<sub>2</sub>), 1.65 – 1.57 (2H, m, CH<sub>2</sub>), 1.53 – 1.46 (2H, m, CH<sub>2</sub>), 1.45 – 1.38 (2H, m, CH<sub>2</sub>), 1.05 (6H, t, <sup>3</sup>J<sub>HH</sub> = 7.1 Hz, 2 x CH<sub>3</sub>).

<sup>13</sup>C NMR (101 MHz, CDCl<sub>3</sub>, 298 K): δ<sub>C</sub> = 137.8 (C), 137.6 (C), 135.5 (C), 129.9 (s, ArCH), 127.5 (s, ArCH), 126.3 (s, ArCH), 47.1 (s, N-CH<sub>2</sub>), 31.5 (s, CH<sub>2</sub>), 29.7 (s, CH<sub>2</sub>), 28.6 (s, CH<sub>2</sub>), 27.9 (s, CH<sub>2</sub>), 27.1 (s, CH<sub>2</sub>), 14.1 (s, CH<sub>2</sub>-CH<sub>3</sub>).

MS (ES<sup>+</sup>) *m/z*: 244.21 ([MH]<sup>+</sup>, 100%), 214.16 ([M – C<sub>2</sub>H<sub>5</sub>]<sup>+</sup>, 28), 171.12 ([M – NEt<sub>2</sub>]<sup>+</sup>, 28); Found(ES<sup>+</sup>) 244.2054 ([MH]<sup>+</sup>), C<sub>17</sub>H<sub>26</sub>N<sup>+</sup> requires 244.2060.

IR (neat) *v*, cm<sup>-1</sup>: 2920, 2850, 1681, 1447, 1252, 1205, 1072.

(1d)<sup>8</sup>

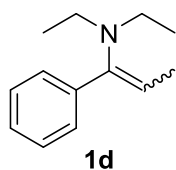

*E* / *Z* = 91 / 9

A hexane solution (120 mL) of propiophenone (5.0 mL, 37.6 mmol) and diethylamine (24.0 mL, 231 mmol) was cooled to 0 °C and TiCl<sub>4</sub> (2.3 mL, 21.0 mmol) was added dropwise and the resulting suspension was left to stir for further 30 minutes followed by stirring the reaction mixture at room temperature for further 24 hours. After this time, the flask was opened to air and water-saturated diethyl ether (23 mL) was added. The solution was filtered and volatiles were removed in vacuo. The product was purified by Kugelrohr distillation (oven T = 85 °C, 1.2 mbar) to afford the desired enamine (2.014 g, 10.6 mmol, 28%) as a pale yellow liquid.

Since the compounds are present as a mixture ( $E/Z = 91:9$ ), signals are given to them separately where possible.

$^1\text{H}$  NMR (400 MHz,  $\text{C}_6\text{D}_6$ , 298 K):  $\delta_{\text{H}}$  ( $E$  isomer) = 7.37 – 7.19 (5H, m, Ar-H), 4.53 (1H, q,  $^3J_{\text{HH}} = 7.0$  Hz, CH), 2.81 (4H, q,  $^3J_{\text{HH}} = 7.0$  Hz, 2 x N-CH<sub>2</sub>), 1.50 (3H, d,  $^3J_{\text{HH}} = 6.9$  Hz, CH-CH<sub>3</sub>), 0.94 (6H, t,  $^3J_{\text{HH}} = 7.0$  Hz, 2 x CH<sub>3</sub>);  $\delta_{\text{H}}$  ( $Z$  isomer) = 7.37 – 7.19 (5H, m, Ar-H), 5.08 (1H, q,  $^3J_{\text{HH}} = 7.1$  Hz, CH), 3.00–2.93 (4H, m, 2 x N-CH<sub>2</sub>), 1.73 (3H, d,  $^3J_{\text{HH}} = 7.0$  Hz, CH-CH<sub>3</sub>), 0.99 (6H, t,  $^3J_{\text{HH}} = 7.1$  Hz, 2 x CH<sub>3</sub>).

$^{13}\text{C}\{^1\text{H}\}$  NMR (101 MHz,  $\text{CDCl}_3$ , 298 K):  $\delta_{\text{C}}$  ( $E$  isomer) = 147.4 (s, N-C), 139.0 (s, <sup>Ar</sup>C), 129.8 (s, <sup>Ar</sup>CH), 127.8 (s, <sup>Ar</sup>CH), 126.9 (s, <sup>Ar</sup>CH), 99.8 (s, C=CH), 43.0 (s, N-CH<sub>2</sub>), 14.0 (s, CH<sub>3</sub>), 11.5 (s, N-CH<sub>2</sub>-CH<sub>3</sub>).  $^{13}\text{C}$  NMR signals for  $Z$ -isomer are not assigned.

MS ( $\text{ES}^+$ )  $m/z$ : 190.16 ( $[\text{MH}]^+$ , 100%); Found( $\text{ES}^+$ ) 190.1588 ( $[\text{MH}]^+$ ),  $\text{C}_{13}\text{H}_{20}\text{N}^+$  requires 190.1590.

#### $N,N$ -Diethyl-1-phenylethenamine (**1e**)<sup>9</sup>

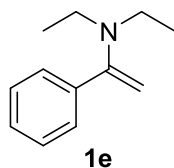

A hexane solution (100 mL) of acetophenone (5.0 mL, 42.9 mmol) and diethylamine (27.0 mL, 260 mmol) was cooled to 0 °C and  $\text{TiCl}_4$  (2.6 mL, 23.7 mmol) was added dropwise and the resulting suspension was left to stir for further 30 minutes followed by stirring the reaction mixture at room temperature for further 24 hours. After this time, the flask was opened to air and the solution was filtered and volatiles were removed in vacuo. The product was purified by Kugelrohr distillation (oven T = 90 °C, 1.5 mbar) to afford the desired enamine (4.043 g, 23.1 mmol, 54%) as a pale yellow liquid.

$^1\text{H}$  NMR (300 MHz,  $\text{C}_6\text{D}_6$ , 298 K):  $\delta_{\text{H}}$  = 7.28 – 7.20 (2H, m, Ar-H), 6.92 – 6.78 (3H, m, Ar-H), 4.13 (1H, s, one of C=CH<sub>2</sub>), 3.91 (1H, s, one of C=CH<sub>2</sub>), 2.58 (4H, q,  $^3J_{\text{HH}} = 7.0$  Hz, 2 x N-CH<sub>2</sub>), 0.61 (6H, t,  $^3J_{\text{HH}} = 7.0$  Hz, 2 x CH<sub>3</sub>).

$^{13}\text{C}\{^1\text{H}\}$  NMR (75 MHz,  $\text{CDCl}_3$ , 298 K):  $\delta_{\text{C}}$  = 154.4 (s, N-C), 141.6 (s, <sup>Ar</sup>C), 128.5 (s, <sup>Ar</sup>CH), 128.4 (s, <sup>Ar</sup>CH), 128.1 (s, <sup>Ar</sup>CH), 90.9 (s, C=CH<sub>2</sub>), 43.7 (s, N-CH<sub>2</sub>), 12.1 (s, CH<sub>3</sub>).

MS ( $\text{ES}^+$ )  $m/z$ : 176.14 ( $[\text{MH}]^+$ , 100%); Found( $\text{ES}^+$ ) 176.1430 ( $[\text{MH}]^+$ ),  $\text{C}_{12}\text{H}_{18}\text{N}^+$  requires 176.1434.

(1f)

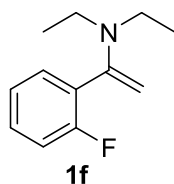

A hexane solution (120 mL) of 1-(2-fluorophenyl)ethan-1-one (5.1 mL, 42.0 mmol) and diethylamine (26.0 mL, 250 mmol) was cooled to 0 °C and TiCl<sub>4</sub> (2.53 mL, 23.1 mmol) was added dropwise and the resulting suspension was left to stir for further 30 minutes followed by stirring the reaction mixture at room temperature for further 24 hours. After this time, the flask was opened to air and water-saturated diethyl ether (26 mL) was added. The solution was filtered and volatiles were removed in vacuo. The product was purified by Kugelrohr distillation (oven T = 88 °C, 1.4 mbar) to afford the desired enamine (4.105 g, 21.2 mmol, 51%) as a pale yellow-green liquid.

Surprisingly – this particular enamine is a lot more stable than other enamines with disubstituted double bonds studied here (no hydrolysis detected in wet chloroform after hours).

Anal. Calcd. for C<sub>12</sub>H<sub>16</sub>FN (found): C, 74.58 (74.52); H, 8.34 (8.26); N, 7.25 (7.36).

<sup>1</sup>H NMR (400 MHz, CDCl<sub>3</sub>, 298 K): δ<sub>H</sub> = 7.40 – 7.33 (1H, m, Ar-H), 7.32 – 7.25 (1H, m, Ar-H), 7.15 – 7.02 (2H, m, Ar-H), 4.10 (1H, s, one of C=CH<sub>2</sub>), 3.93 (1H, s, one of C=CH<sub>2</sub>), 3.04 (4H, q, <sup>3</sup>J<sub>HH</sub> = 7.0 Hz, 2 x N-CH<sub>2</sub>), 1.07 (6H, t, <sup>3</sup>J<sub>HH</sub> = 7.0 Hz, 2 x CH<sub>3</sub>).

<sup>13</sup>C{<sup>1</sup>H} NMR (126 MHz, CDCl<sub>3</sub>, 298 K): δ<sub>C</sub> = 160.0 (d, <sup>1</sup>J<sub>CF</sub> = 248 Hz, <sup>Ar</sup>CF), 147.9 (s, N-C), 131.2 (d, <sup>3</sup>J<sub>CF</sub> = 3.7 Hz, <sup>Ar</sup>CH), 129.1 (d, <sup>3</sup>J<sub>CF</sub> = 8.1 Hz, <sup>Ar</sup>CH), 128.4 (d, <sup>2</sup>J<sub>CF</sub> = 14.7 Hz, <sup>Ar</sup>C), 123.7 (d, <sup>4</sup>J<sub>CF</sub> = 3.7 Hz, <sup>Ar</sup>CH), 115.5 (d, <sup>2</sup>J<sub>CF</sub> = 22.7 Hz, <sup>Ar</sup>CH), 87.9 (s, C=CH<sub>2</sub>), 43.1 (s, N-CH<sub>2</sub>), 12.0 (s, CH<sub>3</sub>).

<sup>19</sup>F{<sup>1</sup>H} NMR (377 MHz, CDCl<sub>3</sub>, 298 K): δ<sub>F</sub> = -116.0 (s).

MS (ES<sup>+</sup>) *m/z*: 194.13 ([MH]<sup>+</sup>, 100%); Found(ES<sup>+</sup>) 194.1334 ([MH]<sup>+</sup>), C<sub>12</sub>H<sub>17</sub>FN<sup>+</sup> requires 194.1340.

IR (neat) *v*, cm<sup>-1</sup>: 2971, 2864, 1602, 1493, 1440, 1371, 1220.

(1g)

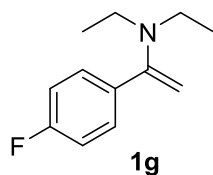

A hexane solution (120 mL) of 1-(4-fluorophenyl)ethan-1-one (5.4 mL, 44.5 mmol) and diethylamine (28.0 mL, 270 mmol) was cooled to 0 °C and TiCl<sub>4</sub> (2.7 mL, 24.6 mmol) was added dropwise and the resulting suspension was left to stir for further 30 minutes followed by stirring the reaction mixture at room temperature for further 24 hours. After this time, the flask was opened to air and water-saturated diethyl ether (27 mL) was added. The solution was filtered and volatiles were removed in vacuo. The product was purified by Kugelrohr distillation (oven T = 58 °C, 0.9 mbar) to afford the desired enamine (2.913 g, 15.1 mmol, 34%) as a pale yellow liquid.

<sup>1</sup>H NMR (300 MHz, C<sub>6</sub>D<sub>6</sub>, 298 K): δ<sub>H</sub> = 7.35 – 7.25 (2H, m, Ar-H), 6.85 – 6.73 (2H, m, Ar-H), 4.31 (1H, s, one of C=CH<sub>2</sub>), 4.14 (1H, s, one of C=CH<sub>2</sub>), 2.79 (4H, q, <sup>3</sup>J<sub>HH</sub> = 7.0 Hz, 2 x N-CH<sub>2</sub>), 0.87 (6H, t, <sup>3</sup>J<sub>HH</sub> = 7.0 Hz, 2 x CH<sub>3</sub>).

<sup>13</sup>C{<sup>1</sup>H} NMR (126 MHz, CDCl<sub>3</sub>, 298 K): δ<sub>C</sub> = 162.6 (d, <sup>1</sup>J<sub>CF</sub> = 246 Hz, <sup>Ar</sup>C<sub>F</sub>), 153.6 (s, N-C), 137.1 (d, <sup>4</sup>J<sub>CF</sub> = 3.0 Hz, <sup>Ar</sup>C), 129.5 (d, <sup>3</sup>J<sub>CF</sub> = 8.0 Hz, <sup>Ar</sup>CH), 114.8 (d, <sup>2</sup>J<sub>CF</sub> = 21.5 Hz, <sup>Ar</sup>CH), 91.3 (s, C=CH<sub>2</sub>), 43.0 (s, N-CH<sub>2</sub>), 11.2 (s, CH<sub>3</sub>).

<sup>19</sup>F{<sup>1</sup>H} NMR (470 MHz, CDCl<sub>3</sub>, 298 K): δ<sub>F</sub> = -115.0 (s).

MS (ES<sup>+</sup>) *m/z*: 194.13 ([MH]<sup>+</sup>, 100%); Found(ES<sup>+</sup>) 194.1333 ([MH]<sup>+</sup>), C<sub>12</sub>H<sub>17</sub>FN<sup>+</sup> requires 194.1340.

IR (neat) *v*, cm<sup>-1</sup>: 2973, 1610, 1519, 1384, 1222, 1093.

(1h)

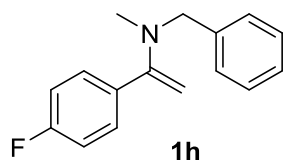

A hexane solution (120 mL) of 1-(4-fluorophenyl)ethan-1-one (5.2 mL, 42.8 mmol) and *N*-methylbenzylamine (33.1 mL, 256 mmol) was cooled to 0 °C and TiCl<sub>4</sub> (2.6 mL, 23.7 mmol) was added dropwise and the resulting suspension was left to stir for further 30 minutes followed by stirring the reaction mixture at room temperature for further 24 hours. After this



time, the flask was opened to air and water-saturated diethyl ether (26 mL) was added. The solution was filtered and volatiles were removed in vacuo. The product was purified by distilling impurities of using Kugelrohr (oven T = 95 °C, 1.4 mbar) to afford the desired enamine (5.928 g, 24.3 mmol, 57%) as very viscous brown oil.

$^1\text{H}$  NMR (300 MHz,  $\text{C}_6\text{D}_6$ , 298 K):  $\delta_{\text{H}} = 7.44 - 7.36$  (2H, m, Ar-H), 7.23 – 7.08 (5H, m, Ar-H), 6.84 – 6.74 (2H, m, Ar-H), 4.32 (1H, s, one of C=CH<sub>2</sub>), 4.16 (1H, s, one of C=CH<sub>2</sub>), 3.81 (2H, s, N-CH<sub>2</sub>), 2.41 (3H, s, CH<sub>3</sub>).

$^{13}\text{C}\{^1\text{H}\}$  NMR (126 MHz,  $\text{CDCl}_3$ , 298 K):  $\delta_{\text{C}} = 162.5$  (d,  $^1J_{\text{CF}} = 246$  Hz,  $^{\text{Ar}}\underline{\text{C}}\text{F}$ ), 155.6 (s, N-C), 138.5 (s,  $^{\text{Ar}}\underline{\text{C}}$ ), 136.0 (d,  $^4J_{\text{CF}} = 3.0$  Hz,  $^{\text{Ar}}\underline{\text{C}}$ ), 129.5 (d,  $^3J_{\text{CF}} = 8.2$  Hz,  $^{\text{Ar}}\underline{\text{C}}\text{H}$ ), 128.2 (s,  $^{\text{Ar}}\underline{\text{C}}\text{H}$ ), 127.8 (s,  $^{\text{Ar}}\underline{\text{C}}\text{H}$ ), 126.9 (s,  $^{\text{Ar}}\underline{\text{C}}\text{H}$ ), 115.0 (d,  $^2J_{\text{CF}} = 20.9$  Hz,  $^{\text{Ar}}\underline{\text{C}}\text{H}$ ), 90.4 (s, C=CH<sub>2</sub>), 56.7 (s, N-CH<sub>2</sub>), 37.9 (s, CH<sub>3</sub>).

$^{19}\text{F}\{^1\text{H}\}$  NMR (282 MHz,  $\text{C}_6\text{D}_6$ , 298 K):  $\delta_{\text{F}} = -114.4$  (s).

MS ( $\text{ES}^+$ )  $m/z$ : 242.13 ( $[\text{MH}]^+$ , 100%); Found( $\text{ES}^+$ ) 242.1336 ( $[\text{MH}]^+$ ),  $\text{C}_{16}\text{H}_{17}\text{FN}^+$  requires 242.1340.

IR (neat)  $\nu$ ,  $\text{cm}^{-1}$ : 3028, 2799, 1601, 1506, 1366, 1219, 1153.

*N*-Benzyl-*N*-methyl-1-phenylethenamine (**1i**)<sup>9</sup>

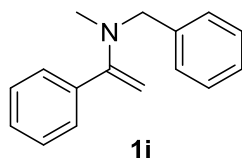

A hexane solution (300 mL) of acetophenone (12.0 mL, 102 mmol) and *N*-methylbenzylamine (79.0 mL, 612 mmol) was cooled to 0 °C and  $\text{TiCl}_4$  (6.2 mL, 56.5 mmol) was added dropwise and the resulting suspension was left to stir for further 30 minutes followed by stirring the reaction mixture at room temperature for further 24 hours. After this time, the flask was opened to air and water-saturated diethyl ether (62 mL) was added. The solution was filtered and volatiles were removed in vacuo. The product was purified by distilling impurities of using Kugelrohr (oven T = 95 °C, 1.5 mbar) to afford the desired enamine (13.462 g, 60.3 mmol, 59%) as very viscous brown oil.

$^1\text{H}$  NMR (300 MHz,  $\text{C}_6\text{D}_6$ , 298 K):  $\delta_{\text{H}} = 7.35 - 7.29$  (2H, m, Ar-H), 6.92 – 6.74 (8H, m, Ar-H), 4.12 (1H, s, one of C=CH<sub>2</sub>), 3.89 (1H, s, one of C=CH<sub>2</sub>), 3.56 (2H, s, N-CH<sub>2</sub>), 2.13 (3H, s, CH<sub>3</sub>).

$^{13}\text{C}$  NMR (75 MHz,  $\text{CDCl}_3$ , 298 K):  $\delta_{\text{C}} = 156.9$  (s, N-C), 140.3 (s,  $\text{ArC}$ ), 138.9 (s,  $\text{ArC}$ ), 128.5 – 128.0 (m,  $\text{ArCH}$ ), 90.4 (s, C= $\underline{\text{C}}\text{H}_2$ ), 57.0 (s, N- $\underline{\text{C}}\text{H}_2$ ), 38.1 (s,  $\underline{\text{C}}\text{H}_3$ ).

MS ( $\text{ES}^+$ )  $m/z$ : 224.14 ( $[\text{MH}]^+$ , 100%), 122.10 ( $[\text{MH}_2 - \text{C}_8\text{H}_7]^+$ , 70), 91.05 ( $[\text{C}_7\text{H}_7]^+$ , 41).

#### General hydroaminovinylation of *N*-benzylpent-4-en-1-amine.

A high pressure autoclave with 4 vials was used. A vial was sealed, purged with argon for 10 minutes and charged with a toluene solution of  $[\text{Rh}(\text{acac})(\text{CO})_2]$  (0.5 mL, 8 mM, containing 4.0  $\mu\text{mol}$  of  $[\text{Rh}(\text{acac})(\text{CO})_2]$ ) followed by toluene solution of BOBPHOS ligand (0.5 mL, 10 mM, containing 5.0  $\mu\text{mol}$  of the ligand). This was left to stir for 10 minutes and toluene solution of *N*-benzylpent-4-en-1-amine (1.0 mL, 1 M, contains 1.0 mmol of *N*-benzylpent-4-en-1-amine and 0.1 mL of 1-methylnaphthalene as an internal standard) was added. This was purged with syngas (1:1 mixture) 3 times, pressurised with syngas (10 bar), heated to the desired temperature and left to stir for 16 hours. After this time, the vessel was cooled to room temperature, the pressure was released and a  $^1\text{H}$  NMR of the crude solution was acquired in order to calculate the conversion.

The reaction was tested at 60 °C (selectivity towards **1j** = 69%), 50 °C (selectivity towards **1j** = 78%) and at 25 °C (selectivity towards **1j** = 68%). Activation of catalyst before the reaction at 50 °C by literature procedure<sup>4</sup> did not make any difference towards selectivity / activity of the catalyst. Single enantiomer of the ligand was tested as well at 50 °C where the same selectivity as with mixture of diastereomers was achieved.

#### Synthesis of 1-benzyl-5-methyl-1,2,3,4-tetrahydropyridine (**1j**).

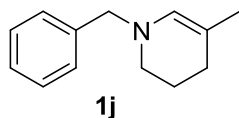

A flask was purged 3 times with vacuum / argon cycles and charged with a toluene solution of  $[\text{Rh}(\text{acac})(\text{CO})_2]$  (4.0 mL, 8 mM, containing 32.0  $\mu\text{mol}$  of  $[\text{Rh}(\text{acac})(\text{CO})_2]$ ) followed by toluene solution of BOBPHOS ligand (4.0 mL, 10 mM, containing 40.0  $\mu\text{mol}$  of the ligand). This was left to stir for 10 minutes and toluene solution of *N*-benzylpent-4-en-1-amine (8.0 mL, 1 M, contains 8.0 mmol of *N*-benzylpent-4-en-1-amine) was added. The flask was charged to the high pressure autoclave, the autoclave was purged with syngas (1:1 mixture) 3 times, pressurised with syngas (10 bar), heated to 50 °C and left to stir for 16 hours. After this time, the vessel was cooled to room temperature, the pressure was released and a  $^1\text{H}$  NMR of

the crude solution was acquired in order to calculate the conversion. The product was isolated by Kugelrohr distillation (oven T = 110 °C, 1.5 mbar) as a pale yellow liquid (0.900 g, 4.81 mmol, 60%).

$^1\text{H}$  NMR (300 MHz,  $\text{CDCl}_3$ , 298 K):  $\delta_{\text{H}} = 7.32\text{--}7.10$  (5H, m, Ar-H), 5.67 (1H, br s, N-CH), 3.77 (2H, s, Ar-CH<sub>2</sub>), 2.70-2.62 (2H, m, N-CH<sub>2</sub>), 1.91-1.71 (4H, m, 2 x CH<sub>2</sub>), 1.52 (3H, s, CH<sub>3</sub>).

$^{13}\text{C}$  NMR (75 MHz,  $\text{CDCl}_3$ , 298 K):  $\delta_{\text{C}} = 139.2$  (s,  $^{\text{Ar}}\text{C}$ ), 131.8 (s, N-CH), 128.8 (s,  $^{\text{Ar}}\text{CH}$ ), 128.7 (s,  $^{\text{Ar}}\text{CH}$ ), 127.4 (s,  $^{\text{Ar}}\text{CH}$ ), 107.4 (s, CH<sub>3</sub>-C), 60.4 (s,  $^{\text{Ar}}\text{C-CH}_2$ ), 47.8 (s, N-CH<sub>2</sub>), 27.1 (s, CH<sub>2</sub>), 23.1 (s, CH<sub>2</sub>), 21.4 (s, CH<sub>3</sub>).

MS ( $\text{ES}^+$ )  $m/z$ : 188.14 ( $[\text{MH}]^+$ , 100%), 176.14 ( $[\text{M} - \text{CH}]^+$ , 26), 91.05 ( $[\text{C}_7\text{H}_7]^+$ , 23).

### Hydrogenation of enamines.

#### General procedure for enamine hydrogenation.

A high pressure autoclave with 4 vials was used. A vial was charged with the desired ligand (8.0  $\mu\text{mol}$ ), sealed and purged with Ar for 10 minutes. The ligand was dissolved in toluene (0.5 mL) and a toluene solution of  $[\text{Rh}(\text{COD})\text{Cl}]_2$  (0.5 mL, 4 mM, containing 2.0  $\mu\text{mol}$  of  $[\text{Rh}(\text{COD})\text{Cl}]_2$ ) was added. This was left to stir for 10 minutes before a toluene solution of the desired enamine (1.0 mL, 1 M, contains 1.0 mmol of enamine and 0.1 mL of 1-methylnaphthalene) was added and the resulting solution was stirred for 5 minutes. After this time, the vial placed into the pre-purged autoclave, the autoclave was sealed, purged with hydrogen 3 times, pressurised with  $\text{H}_2$  gas to the desired pressure, heated to 65 °C and left to stir for 16 hours. After this time, the autoclave was cooled to room temperature, the gas pressure was released and  $^1\text{H}$  NMR of the crude reaction solution was acquired in order to calculate the conversion.

### Isolation of amines.

#### General procedure (2b, 2d–2j).

After catalytic hydrogenation of enamine (only in cases of full conversions to the amines), the solution was diluted with toluene (8 mL) and the amine was extracted with hydrochloric acid (1 M, 3  $\times$  20 mL). Combined acid fractions were basified with aq. NaOH (1 M) until pH 12, and the amine was extracted with ethyl acetate (3  $\times$  25 mL). Combined organic fractions

were washed with brine (30 mL), dried over MgSO<sub>4</sub> and solvent was removed under reduced pressure. The desired product was dried in vacuo for 50 minutes to afford the desired amine.

(2b)

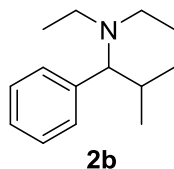

The product is a pale-yellow oil (152 mg, 74.0 mmol, 74%).

<sup>1</sup>H NMR (300 MHz, CDCl<sub>3</sub>, 298 K):  $\delta_{\text{H}} = 7.34 - 7.19$  (3H, m, Ar-H),  $7.17 - 7.11$  (2H, m, Ar-H),  $3.22$  (1H, d, <sup>3</sup>*J*<sub>HH</sub> = 9.5 Hz, N-CH),  $2.70 - 2.55$  (2H, m, CH<sub>2</sub>),  $2.30 - 2.16$  (1H, m, CH),  $2.15 - 2.01$  (2H, m, CH<sub>2</sub>),  $1.06 - 0.98$  (9H, m, 3 x CH<sub>3</sub>),  $0.70$  (3H, d, <sup>3</sup>*J*<sub>HH</sub> = 6.5 Hz, CH-CH<sub>3</sub>).

<sup>13</sup>C NMR (75 MHz, CDCl<sub>3</sub>, 298 K):  $\delta_{\text{C}} = 138.9$  (ArC),  $129.2$  (s, ArCH),  $127.5$  (s, ArCH),  $126.4$  (s, ArCH),  $70.6$  (s, N-CH),  $42.7$  (s, CH<sub>2</sub>),  $28.6$  (s, CH),  $20.9$  (s, CH-CH<sub>3</sub>),  $20.1$  (s, CH-CH<sub>3</sub>),  $13.3$  (s, CH<sub>2</sub>-CH<sub>3</sub>).

MS (ES<sup>+</sup>) *m/z*: 206.19 ([MH]<sup>+</sup>, 100%), 133.10 ([M - NEt<sub>2</sub>]<sup>+</sup>, 21); Found(ES<sup>+</sup>) 206.1901 ([MH]<sup>+</sup>), C<sub>14</sub>H<sub>24</sub>N<sup>+</sup> requires 206.1903.

IR (neat)  $\nu$ , cm<sup>-1</sup>: 2966, 2812, 1450, 1381, 1051.

(2c)

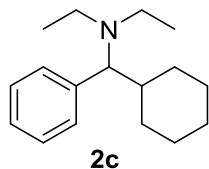

Since conversion was only 67%, after acid-basic work-up the amine was obtained as a 2:1 mixture with enamine (due to high stability of enamine, it was not hydrolysed). The mixture was dissolved in ethyl acetate and passed through a short column of silica (eluting solvent is EtOAc:Petroleum ether (40–60):Et<sub>3</sub>N as 1:3:0.08 mixture). This allowed all enamine to form some new compounds. After this, the solvents were removed under reduced pressure and the

mixture was purified by a silica column (eluting solvent is EtOAc:Petroleum ether (40–60):Et<sub>3</sub>N as 1:14:0.08 mixture; R<sub>f</sub> = 0.13) to afford the desired amine (77 mg, 31.4 mmol, 47%) as a colourless viscous oil.

<sup>1</sup>H NMR (400 MHz, CDCl<sub>3</sub>, 298 K): δ<sub>H</sub> = 7.36 – 7.22 (3H, m, Ar-H), 7.19 – 7.13 (2H, m, Ar-H), 3.37 (1H, d, <sup>3</sup>J<sub>HH</sub> = 9.7 Hz, N-CH), 2.71 – 2.60 (2H, m, N-CH<sub>2</sub>), 2.20 – 2.05 (3H, m, CH and N-CH<sub>2</sub>), 1.98 – 1.87 (1H, m, one of CH<sub>2</sub>), 1.85 – 1.76 (1H, m, one of CH<sub>2</sub>), 1.72 – 1.60 (2H, m, CH<sub>2</sub>), 1.47 – 1.12 (4H, m, 2 x CH<sub>2</sub>), 1.05 (6H, t, <sup>3</sup>J<sub>HH</sub> = 7.1 Hz, 2 x CH<sub>3</sub>), 1.00 – 0.87 (1H, m, one of CH<sub>2</sub>), 0.82 – 0.70 (1H, m, one of CH<sub>2</sub>).

<sup>13</sup>C NMR (101 MHz, CDCl<sub>3</sub>, 298 K): δ<sub>C</sub> = 138.7 (ArC), 129.2 (s, ArCH), 127.5 (s, ArCH), 126.4 (s, ArCH), 69.3 (s, N-CH), 42.8 (s, N-CH<sub>2</sub>), 38.3 (s, CH), 31.2 (s, CH<sub>2</sub>), 30.8 (s, CH<sub>2</sub>), 26.9 (s, CH<sub>2</sub>), 26.4 (s, CH<sub>2</sub>), 26.3 (s, CH<sub>2</sub>), 13.4 (s, CH<sub>2</sub>-CH<sub>3</sub>).

MS (ES<sup>+</sup>) *m/z*: 246.22 ([MH]<sup>+</sup>, 100%), 173.13 ([M – NEt<sub>2</sub>]<sup>+</sup>, 84); Found(ES<sup>+</sup>) 246.2207 ([MH]<sup>+</sup>), C<sub>17</sub>H<sub>28</sub>N<sup>+</sup> requires 246.2216.

IR (neat) *v*, cm<sup>-1</sup>: 2972, 2783, 1492, 1448, 1159.

(2d)

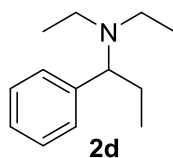

The product is a pale-yellow oil (174 mg, 90.9 mmol, 91%).

<sup>1</sup>H NMR (300 MHz, CDCl<sub>3</sub>, 298 K): δ<sub>H</sub> = 7.34 – 7.19 (5H, m, Ar-H), 3.51 (1H, dd, <sup>3</sup>J<sub>HH</sub> = 9.5 Hz, <sup>3</sup>J<sub>HH</sub> = 5.1 Hz, N-CH), 2.72 – 2.58 (2H, m, N-CH<sub>2</sub>), 2.44 – 2.29 (2H, m, N-CH<sub>2</sub>), 2.00 – 1.84 (1H, m, one from CH<sub>2</sub>), 1.80 – 1.63 (1H, m, one from CH<sub>2</sub>), 1.00 (6H, t, <sup>3</sup>J<sub>HH</sub> = 7.1 Hz, 2 x N-CH<sub>2</sub>-CH<sub>3</sub>), 0.76 (3H, t, <sup>3</sup>J<sub>HH</sub> = 7.3 Hz, CH<sub>3</sub>).

<sup>13</sup>C NMR (101 MHz, CDCl<sub>3</sub>, 298 K): δ<sub>C</sub> = 141.8 (ArC), 128.7 (s, ArCH), 127.9 (s, ArCH), 126.6 (s, ArCH), 66.5 (s, N-CH), 43.1 (s, N-CH<sub>2</sub>), 25.8 (s, CH), 12.5 (s, N-CH<sub>2</sub>-CH<sub>3</sub>), 11.4 (s, CH<sub>3</sub>).

MS (ES<sup>+</sup>) *m/z*: 192.17 ([MH]<sup>+</sup>, 100%); Found(ES<sup>+</sup>) 192.1747 ([MH]<sup>+</sup>), C<sub>13</sub>H<sub>22</sub>N<sup>+</sup> requires 192.1747.

IR (neat) *v*, cm<sup>-1</sup>: 2966, 2810, 1450, 1379, 1196, 1051.

*N,N*-Diethyl-1-phenylethanamine (**2e**)<sup>9</sup>

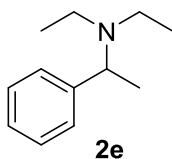

The product is a pale-yellow oil (148 mg, 83.5 mmol, 83%).

<sup>1</sup>H NMR (300 MHz, CDCl<sub>3</sub>, 298 K):  $\delta_{\text{H}} = 7.31 - 7.07$  (5H, m, Ar-H), 3.70 (1H, q,  $^3J_{\text{HH}} = 6.7$  Hz, CH), 2.57 – 2.33 (4H, m, 2 x CH<sub>2</sub>), 1.25 (3H, d,  $^3J_{\text{HH}} = 6.7$  Hz, CH-CH<sub>3</sub>), 0.90 (6H, t,  $^3J_{\text{HH}} = 7.1$  Hz, 2 x -CH<sub>2</sub>-CH<sub>3</sub>).

<sup>13</sup>C NMR (75 MHz, CDCl<sub>3</sub>, 298 K):  $\delta_{\text{C}} = 145.3$  (ArC), 128.1 (s, ArCH), 127.6 (s, ArCH), 126.5 (s, ArCH), 59.2 (s, N-CH), 42.9 (s, CH<sub>2</sub>), 18.5 (s, CH-CH<sub>3</sub>), 12.2 (s, CH<sub>2</sub>-CH<sub>3</sub>).

MS (ES<sup>+</sup>) *m/z*: 178.16 ([MH]<sup>+</sup>, 86%), 105.07 ([M – NEt<sub>2</sub>]<sup>+</sup>, 100); Found(ES<sup>+</sup>) 178.1586 ([MH]<sup>+</sup>), C<sub>12</sub>H<sub>20</sub>N<sup>+</sup> requires 178.1590.

(**2f**)

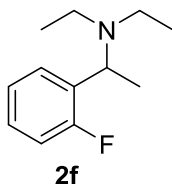

The product is a pale-yellow oil (107 mg, 54.8 mmol, 55%).

<sup>1</sup>H NMR (300 MHz, CDCl<sub>3</sub>, 298 K):  $\delta_{\text{H}} = 7.48 - 7.40$  (1H, m, Ar-H), 7.23 – 7.14 (1H, m, Ar-H), 7.13 – 7.06 (1H, m, Ar-H), 7.04 – 6.95 (1H, m, Ar-H), 4.19 (1H, q,  $^3J_{\text{HH}} = 6.8$  Hz, CH), 2.70 – 2.43 (4H, m, 2 x CH<sub>2</sub>), 1.35 (3H, d,  $^3J_{\text{HH}} = 6.8$  Hz, CH-CH<sub>3</sub>), 1.00 (6H, t,  $^3J_{\text{HH}} = 7.1$  Hz, 2 x -CH<sub>2</sub>-CH<sub>3</sub>).

<sup>19</sup>F{<sup>1</sup>H} NMR (282 MHz, CDCl<sub>3</sub>, 298 K):  $\delta_{\text{F}} = -119.1$  (s).

<sup>13</sup>C{<sup>1</sup>H} NMR (75 MHz, CDCl<sub>3</sub>, 298 K):  $\delta_{\text{C}} = 160.8$  (d,  $^1J_{\text{CF}} = 245$  Hz, ArCF), 131.6 (d,  $^2J_{\text{CF}} = 13.6$  Hz, ArC), 128.7 (d,  $^3J_{\text{CF}} = 4.9$  Hz, ArCH), 127.8 (d,  $^3J_{\text{CF}} = 8.4$  Hz, ArCH), 123.8 (d,  $^4J_{\text{CF}} = 3.5$  Hz, ArCH), 115.1 (d,  $^2J_{\text{CF}} = 23.3$  Hz, ArCH), 51.8 (s, N-C), 42.8 (s, N-CH<sub>2</sub>), 19.2 (s, CH-CH<sub>3</sub>), 11.8 (s, CH<sub>2</sub>-CH<sub>3</sub>).

MS (ES<sup>+</sup>) *m/z*: 196.15 ([MH]<sup>+</sup>, 100%), 123.06 ([M – NEt<sub>2</sub>]<sup>+</sup>, 40); Found(ES<sup>+</sup>) 196.1492 ([MH]<sup>+</sup>), C<sub>12</sub>H<sub>20</sub>N<sup>+</sup> requires 196.1496.

IR (neat)  $\nu$ ,  $\text{cm}^{-1}$ : 2951, 2789, 1452, 1360, 1094, 1011.

(2g)

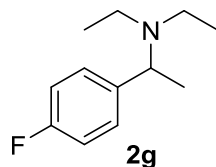

The product is a pale-yellow oil (111 mg, 56.8 mmol, 57%).

$^1\text{H}$  NMR (300 MHz,  $\text{CDCl}_3$ , 298 K):  $\delta_{\text{H}} = 7.36 - 7.27$  (2H, m, Ar-H),  $7.03 - 6.92$  (2H, m, Ar-H),  $3.77$  (1H, q,  $^3J_{\text{HH}} = 6.8$  Hz, CH),  $2.62 - 2.40$  (4H, m, 2 x  $\text{CH}_2$ ),  $1.30$  (3H, d,  $^3J_{\text{HH}} = 6.7$  Hz, CH- $\text{CH}_3$ ),  $0.98$  (6H, t,  $^3J_{\text{HH}} = 7.1$  Hz, 2 x  $-\text{CH}_2-\text{CH}_3$ ).

$^{19}\text{F}\{^1\text{H}\}$  NMR (282 MHz,  $\text{CDCl}_3$ , 298 K):  $\delta_{\text{F}} = -117.4$  (s).

$^{13}\text{C}\{^1\text{H}\}$  NMR (75 MHz,  $\text{CDCl}_3$ , 298 K):  $\delta_{\text{C}} = 161.6$  (d,  $^1J_{\text{CF}} = 244$  Hz,  $\text{Ar}\text{-}\underline{\text{C}}\text{F}$ ),  $141.0$  (d,  $^4J_{\text{CF}} = 3.1$  Hz,  $\text{Ar}\text{-}\underline{\text{C}}$ ),  $128.9$  (d,  $^3J_{\text{CF}} = 7.7$  Hz,  $\text{Ar}\text{-}\underline{\text{C}}\text{H}$ ),  $114.7$  (d,  $^2J_{\text{CF}} = 21.0$  Hz,  $\text{Ar}\text{-}\underline{\text{C}}\text{H}$ ),  $58.4$  (s, N- $\underline{\text{C}}$ ),  $42.7$  (s, N- $\underline{\text{C}}\text{H}_2$ ),  $18.2$  (s, CH- $\underline{\text{C}}\text{H}_3$ ),  $12.1$  (s,  $\text{C}\text{H}_2\text{-}\underline{\text{C}}\text{H}_3$ ).

MS ( $\text{ES}^+$ )  $m/z$ : 196.15 ( $[\text{MH}]^+$ , 100%), 123.06 ( $[\text{M} - \text{NEt}_2]^+$ , 16); Found( $\text{ES}^+$ ) 196.1492 ( $[\text{MH}]^+$ ),  $\text{C}_{12}\text{H}_{20}\text{N}^+$  requires 196.1496.

IR (neat)  $\nu$ ,  $\text{cm}^{-1}$ : 2968, 2810, 1602, 1506, 1221, 1074.

(2h)

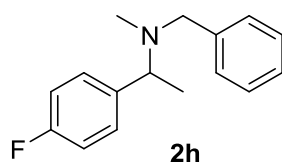

The product is a very viscous yellow oil (214 mg, 87.9 mmol, 88%).

$^1\text{H}$  NMR (300 MHz,  $\text{CDCl}_3$ , 298 K):  $\delta_{\text{H}} = 7.34 - 7.10$  (7H, m, Ar-H),  $7.00 - 6.89$  (2H, m, Ar-H),  $3.55$  (1H, q,  $^3J_{\text{HH}} = 6.7$  Hz, N-CH),  $3.47$  (1H, d,  $^2J_{\text{HH}} = 13.3$  Hz, one of  $\text{CH}_2$ ),  $3.23$  (1H, d,  $^2J_{\text{HH}} = 13.3$  Hz, one of  $\text{CH}_2$ ),  $2.04$  (3H, s, N- $\text{CH}_3$ ),  $1.32$  (3H, d,  $^3J_{\text{HH}} = 6.7$  Hz, CH- $\text{CH}_3$ ).

$^{13}\text{C}$  NMR (75 MHz,  $\text{CDCl}_3$ , 298 K):  $\delta_{\text{C}} = 161.7$  (d,  $^1J_{\text{CF}} = 244$  Hz,  $\text{Ar}\text{-}\underline{\text{C}}\text{F}$ ),  $140.0\text{-}139.8$  (m, two quaternary  $\text{Ar}\text{-}\underline{\text{C}}$ ),  $129.0$  (d,  $^3J_{\text{CF}} = 7.8$  Hz,  $\text{Ar}\text{-}\underline{\text{C}}\text{H}$ ),  $128.7$  (s,  $\text{Ar}\text{-}\underline{\text{C}}\text{H}$ ),  $128.2$  (s,  $\text{Ar}\text{-}\underline{\text{C}}\text{H}$ ),  $126.8$

(s,  $^{Ar}\underline{CH}$ ), 114.9 (d,  $^2J_{CF} = 21.0$  Hz,  $^{Ar}\underline{CH}$ ), 62.3 (s, N- $\underline{C}$ ), 58.7 (s,  $\underline{CH}_2$ ), 38.2 (s, N- $\underline{CH}_3$ ), 18.1 (s, CH- $\underline{CH}_3$ ).

$^{19}F\{^1H\}$  NMR (282 MHz,  $CDCl_3$ , 298 K):  $\delta_F = -116.9$  (s).

MS ( $ES^+$ )  $m/z$ : 244.15 ( $[MH]^+$ , 100%); Found( $ES^+$ ) 244.1488 ( $[MH]^+$ ),  $C_{16}H_{19}FN^+$  requires 244.1496.

IR (neat)  $\nu$ ,  $cm^{-1}$ : 2972, 2785, 1601, 1506, 1494, 1452, 1219, 1153.

### *N*-Benzyl-*N*-methyl-1-phenylethanamine (**2i**)<sup>9</sup>

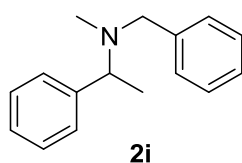

The product is a very viscous yellow oil (206 mg, 91.4 mmol, 91%).

$^1H$  NMR (300 MHz,  $CDCl_3$ , 298 K):  $\delta_H = 7.36 - 7.09$  (10H, m, Ar- $\underline{H}$ ), 3.55 (1H, q,  $^3J_{HH} = 6.7$  Hz, N- $\underline{CH}$ ), 3.49 (1H, d,  $^2J_{HH} = 13.2$  Hz, one of  $\underline{CH}_2$ ), 3.21 (1H, d,  $^2J_{HH} = 13.2$  Hz, one of  $\underline{CH}_2$ ), 2.05 (3H, s, N- $\underline{CH}_3$ ), 1.33 (3H, d,  $^3J_{HH} = 6.7$  Hz, CH- $\underline{CH}_3$ ).

$^{13}C$  NMR (75 MHz,  $CDCl_3$ , 298 K):  $\delta_C = 144.1$  (s,  $^{Ar}\underline{C}$ ), 140.0 (s,  $^{Ar}\underline{C}$ ), 128.7 (s,  $^{Ar}\underline{CH}$ ), 128.2 (2 x C, s,  $^{Ar}\underline{CH}$ ), 127.7 (s,  $^{Ar}\underline{CH}$ ), 126.8 (s,  $^{Ar}\underline{CH}$ ), 126.7 (s,  $^{Ar}\underline{CH}$ ), 63.2 (s, N- $\underline{CH}$ ), 58.8 (s,  $\underline{CH}_2$ ), 38.3 (s, N- $\underline{CH}_3$ ), 18.4 (s, CH- $\underline{CH}_3$ ).

MS ( $ES^+$ )  $m/z$ : 226.16 ( $[MH]^+$ , 100%).

### 1-Benzyl-3-methylpiperidine (**2j**)

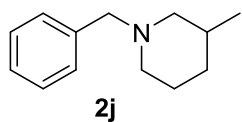

The product is a yellow oil (0.140 g, 74.0 mmol, 74% yield).

$^1H$  NMR (300 MHz,  $CDCl_3$ , 298 K):  $\delta_H = 7.27 - 7.02$  (5H, m, Ar- $\underline{H}$ ), 3.38 (2H, s, Ar- $\underline{CH}_2$ ), 2.76 - 2.64 (2H, m,  $\underline{CH}_2$ ), 1.82 - 1.70 (1H, m, Alkyl- $\underline{H}$ ), 1.65 - 1.41 (5H, m, Alkyl- $\underline{H}$ s), 0.84 - 0.67 (1H, m, Alkyl- $\underline{H}$ ), 0.74 (3H, d,  $^3J_{HH} = 6.2$  Hz,  $\underline{CH}_3$ ).

$^{13}C\{^1H\}$  NMR (75 MHz,  $CDCl_3$ , 298 K):  $\delta_C = 138.2$  (s,  $^{Ar}\underline{C}$ ), 129.1 (s,  $^{Ar}\underline{CH}$ ), 128.0 (s,  $^{Ar}\underline{CH}$ ), 126.8 (s,  $^{Ar}\underline{CH}$ ), 63.4 (s,  $^{Ar}\underline{C-CH}_2$ ), 61.7 (s,  $\underline{CH}_2$ ), 53.8 (s,  $\underline{CH}_2$ ), 32.9 (s, CH- $\underline{CH}_2$ ), 30.9 (s,  $\underline{CH}$ ), 25.3 (s,  $\underline{CH}_2$ ), 19.6 (s,  $\underline{CH}_3$ ).



MS (ES<sup>+</sup>) *m/z*: 190.16 ([MH]<sup>+</sup>, 100%); Found(ES<sup>+</sup>) 190.1587 ([MH]<sup>+</sup>), C<sub>13</sub>H<sub>20</sub>N<sup>+</sup> requires 190.1590.

### Reactions in (*R*)-limonene as a solvent.

A high pressure autoclave with 4 vials was used. A vial was charged with [Rh(COD)Cl]<sub>2</sub> (1.0 mg, 2.0 μmol) and the desired ligand (8.0 μmol), sealed and purged with Ar for 10 minutes. A (*R*)-limonene solution of the desired enamine (2.0 mL, 0.5 M, contains 1.0 mmol of enamine, 6.7 mmol of solvent and 0.1 mL of 1-methylnaphthalene) was added and the resulting solution was stirred for 5 minutes. After this time, the vial placed into the pre-purged autoclave, the autoclave was sealed, purged with hydrogen 3 times, pressurised with H<sub>2</sub> gas to the desired pressure, heated to the desired temperature and left to stir for 16 hours. After this time, the autoclave was cooled to room temperature, the gas pressure was released and <sup>1</sup>H NMR of the crude reaction solution was acquired in order to calculate the conversion (see Table 1 below – for scheme see Table 3 in the paper).

**Table 1.** Hydrogenation of enamines in (*R*)-limonene

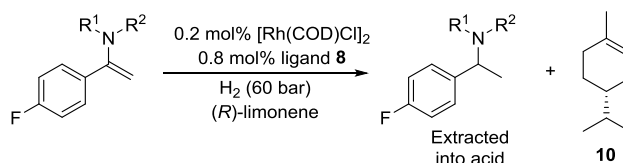

| Entry <sup>a</sup> | Enamine   | Ligand   | Time, h | T, °C | Amine, % <sup>b</sup> | <b>10</b> , % <sup>b</sup> |
|--------------------|-----------|----------|---------|-------|-----------------------|----------------------------|
| 1 <sup>c</sup>     | <b>1g</b> | <b>4</b> | 16      | 65    | 34                    | > 99                       |
| 2 <sup>c</sup>     | <b>1g</b> | <b>8</b> | 16      | 65    | > 99                  | 91                         |
| 3                  | <b>1h</b> | <b>4</b> | 16      | 40    | 0                     | 48                         |
| 4                  | <b>1h</b> | <b>8</b> | 16      | 40    | 74                    | 20                         |
| 5                  | <b>1h</b> | <b>4</b> | 20      | 45    | 11                    | 65                         |
| 6                  | <b>1h</b> | <b>8</b> | 20      | 45    | 92                    | 23                         |

<sup>a</sup>General conditions: 1.5 mmol of **1h**, 0.2 mol % of [Rh(COD)Cl]<sub>2</sub>, 0.8 mol % ligand, 0.15 mL of 1-methylnaphthalene as an internal standard, 60 bar of H<sub>2</sub> gas, (*R*)-limonene. Ratio of solvent/enamine = 6.68:1. <sup>b</sup>Determined by <sup>1</sup>H NMR relative to 1-methylnaphthalene. <sup>c</sup>Ratio of solvent/enamine = 6.74:1.

Amine products from entries 2 and 6 were isolated by the following procedure:

The solution was diluted with (*R*)-limonene (8 mL) and the amine was extracted with hydrochloric acid (1 M, 3 × 20 mL). The combined aqueous fractions were basified with aq. NaOH (1 M) until pH 12, and the amine was extracted with ethyl acetate (3 × 25 mL). The

combined organic fractions were washed with brine (30 mL), dried over MgSO<sub>4</sub> and the solvent was removed under reduced pressure. The desired product was dried in vacuo for 50 minutes to afford the desired amine. Purity of **2g** is >99%; and the product from entry 6 was isolated as a 9:1 mixture of **2h** and *N*-methylbenzylamine respectively due to the ~90% conversion of the enamine. In order to confirm that the chiral solvent doesn't result in any asymmetric induction, the ee for entries 2 and 6 was measured by addition of 1.2 equivalents of (*R*)- $\alpha$ -methoxyphenylacetic acid to isolated samples of amines, and <sup>1</sup>H NMR spectra were acquired; enantiomeric excess was found to be 0%.

### References.

1. T. G. Schenck, J. M. Downes, C. R. C. Milne, P. B. Mackenzie, H. Boucher, J. Whelan, B. Bosnich, *Inorg. Chem.*, 1985, **24**, 2334.
2. R.A. Baber, M.L. Clarke, K. Heslop, A. Marr, A.G. Orpen, P.G. Pringle and A.M. Ward, D.A. Zambrano-Williams, *Dalton Trans.* 2005, 1079.
3. M.L. Clarke, D. Ellis, K.L. Mason, A.G. Orpen, P.G. Pringle, R.L. Wingad, D.A. Zaher and R.T. Baker, *Dalton Trans.* 2005, 1294.
4. G. M. Noonan, J. A. Fuentes, C. J. Cobley, M. L. Clarke, *Angew. Chem. Int. Ed.*, 2012, **51**, 2477.
5. D. V. Gribkov, K. C. Hultsch, *Angew. Chem. Int. Ed.*, 2004, **43**, 5542.
6. W. A. White, H. Weingarten, *J. Org. Chem.*, 1967, **32**, 213.
7. P. Fang, X.-L. Hou, *Org. Lett.*, 2009, **11**, 4612.
8. X. Zeng, G.D. Frey, S. Kousar, G. Bertrand, *Chem. Eur. J.*, 2009, **15**, 3056.
9. N.E. Lee, S.L. Buchwald, *J. Am. Chem. Soc.*, 1994, **116**, 5985.

## NMR spectra.

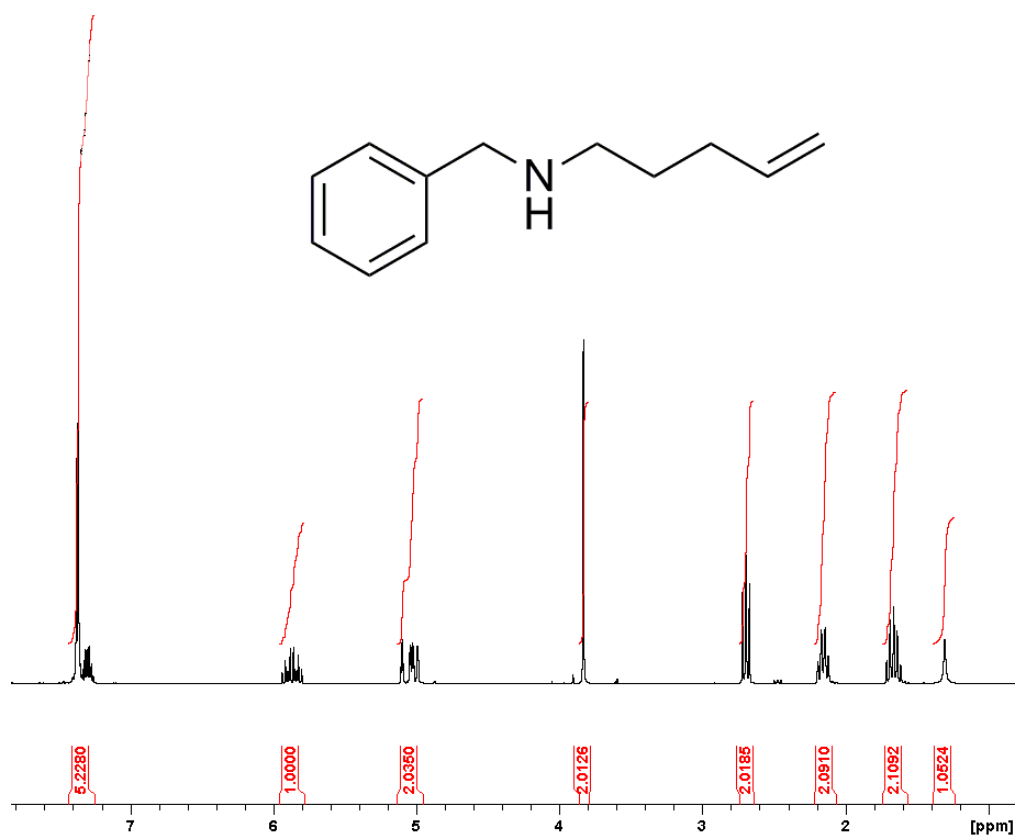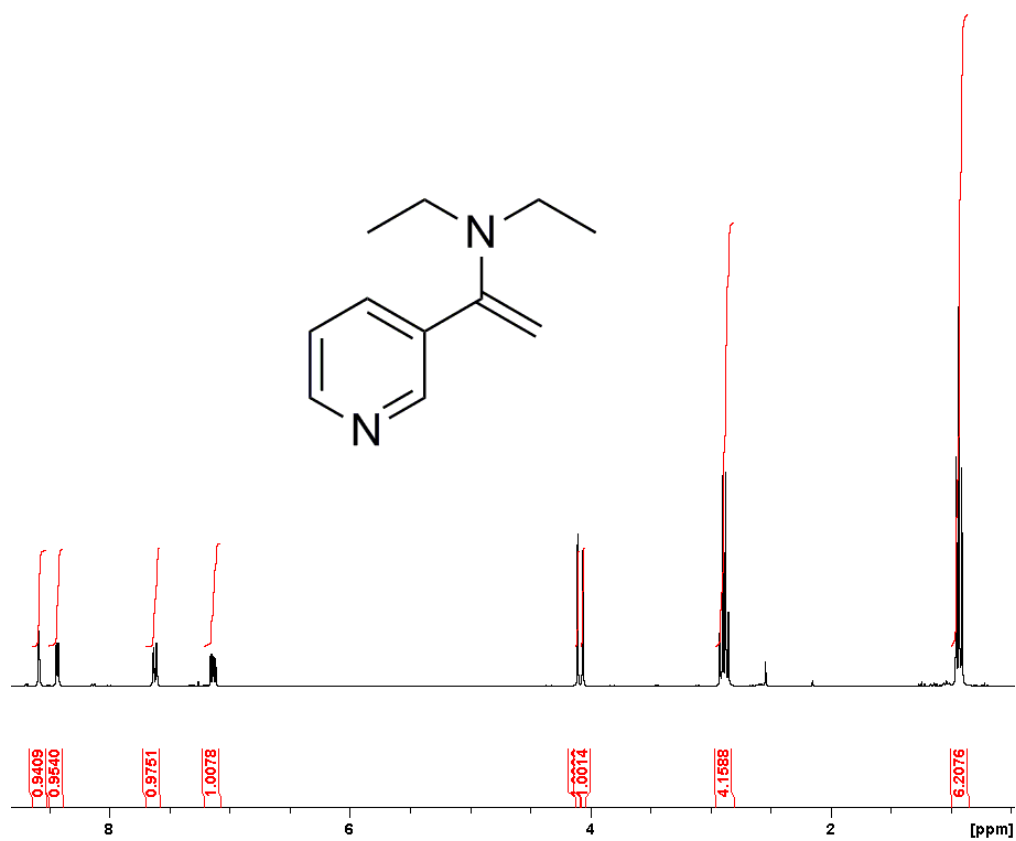

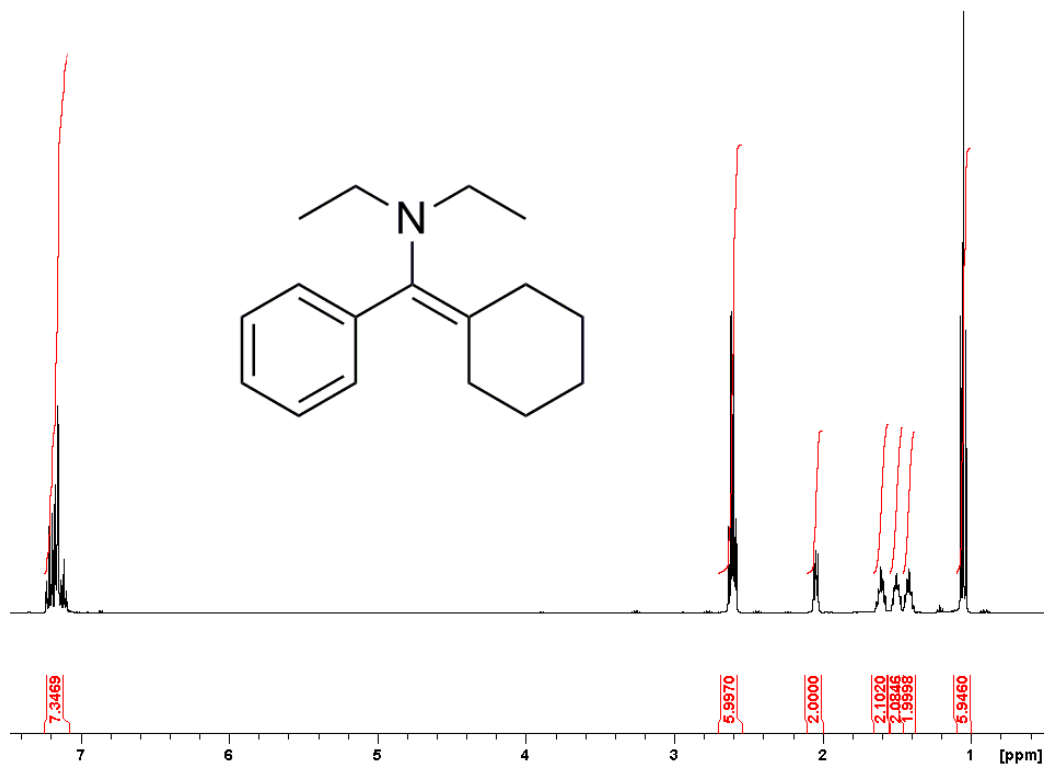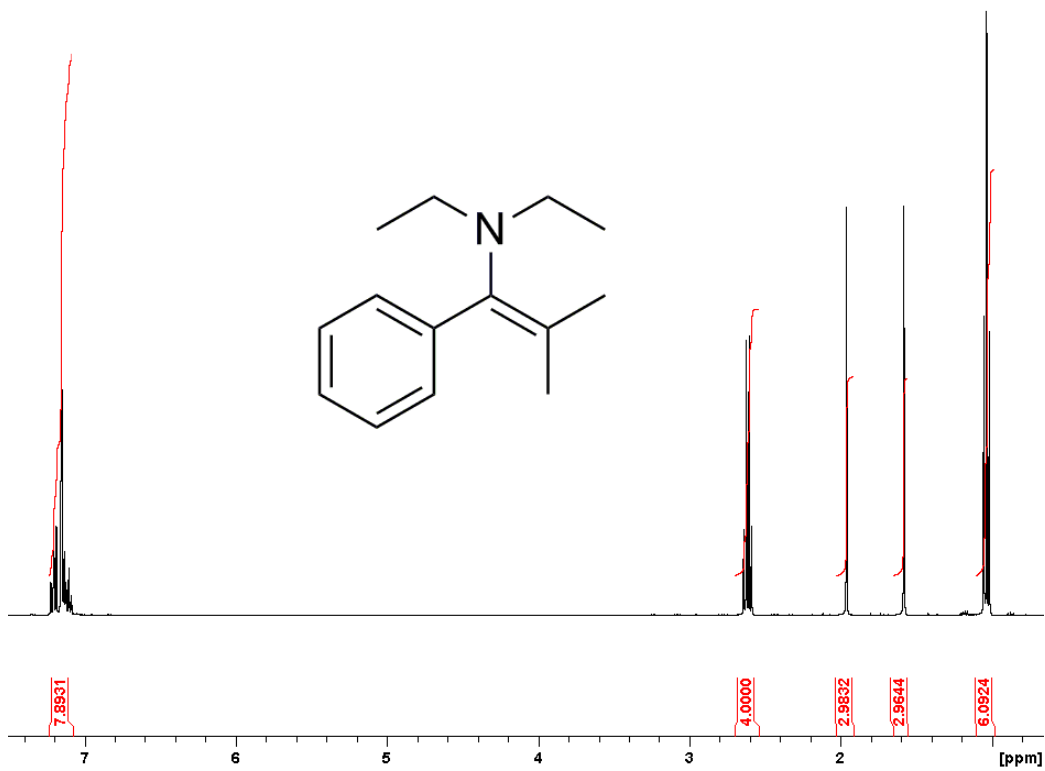

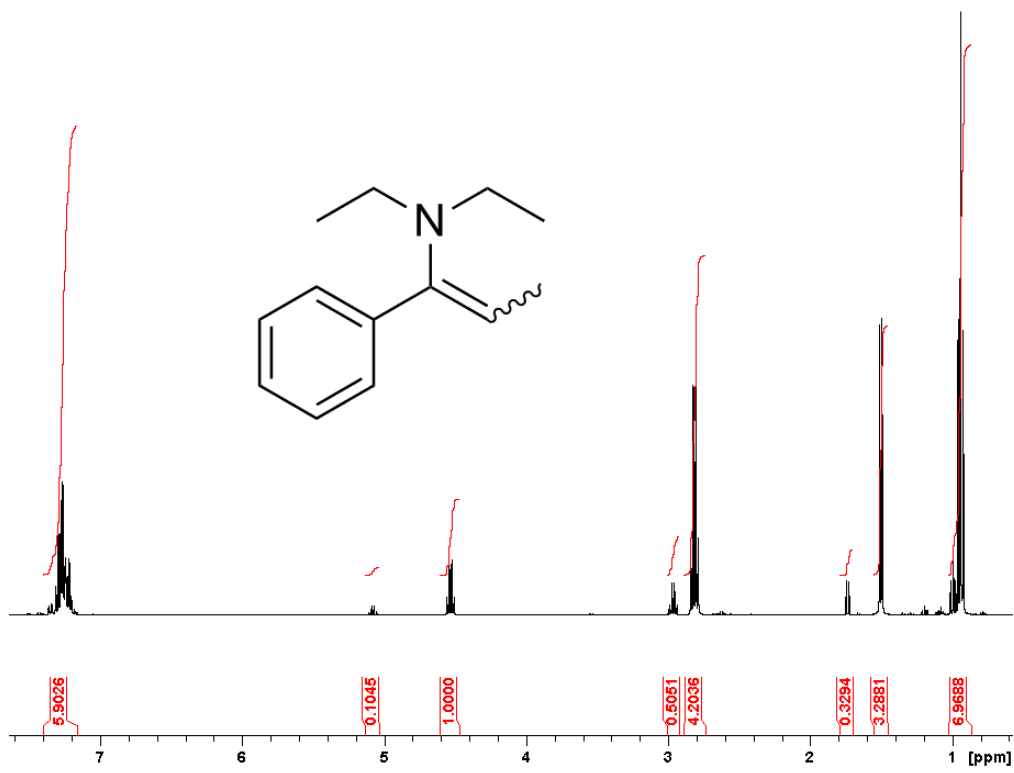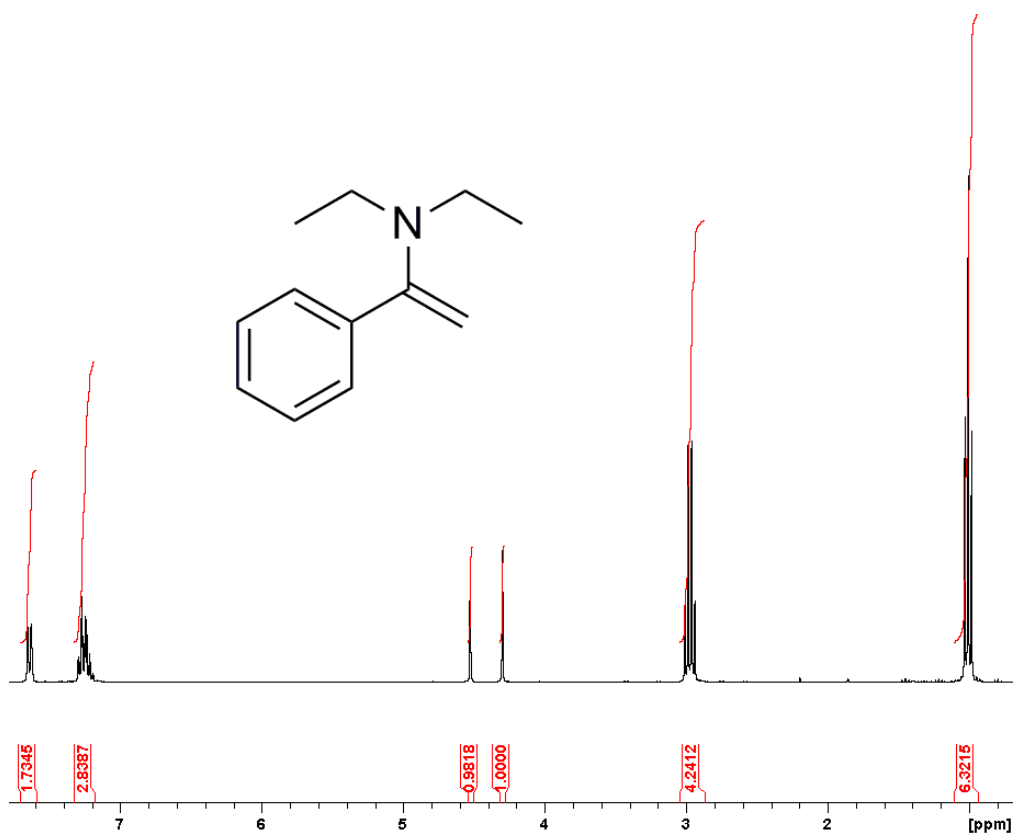

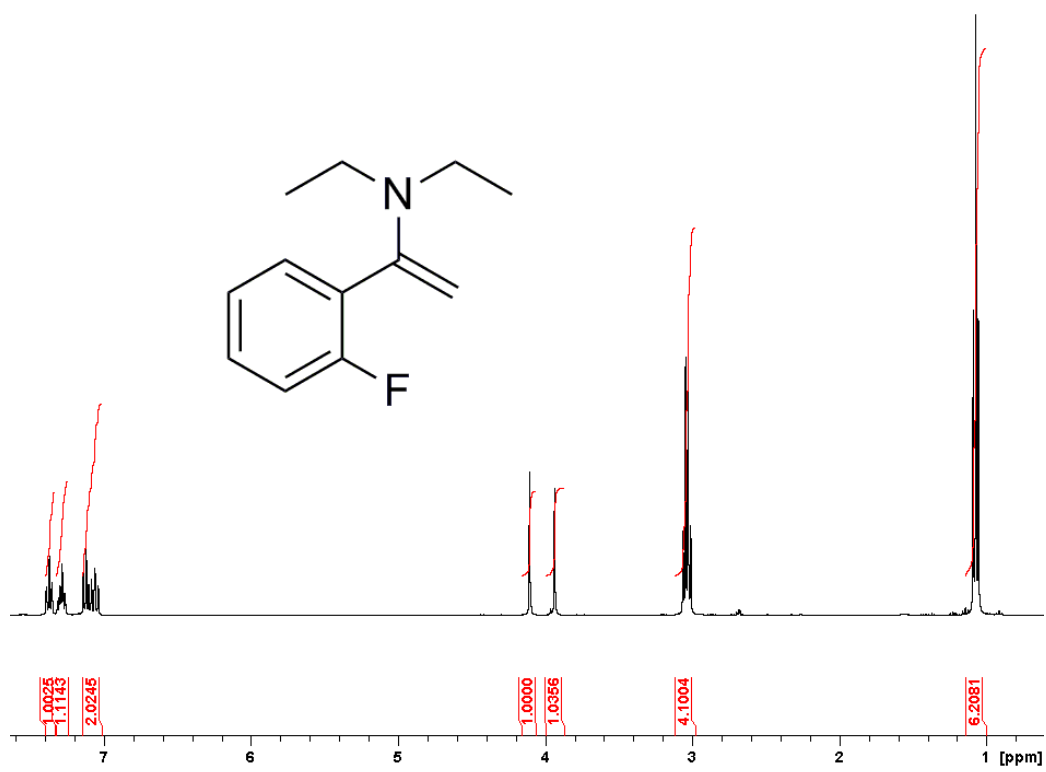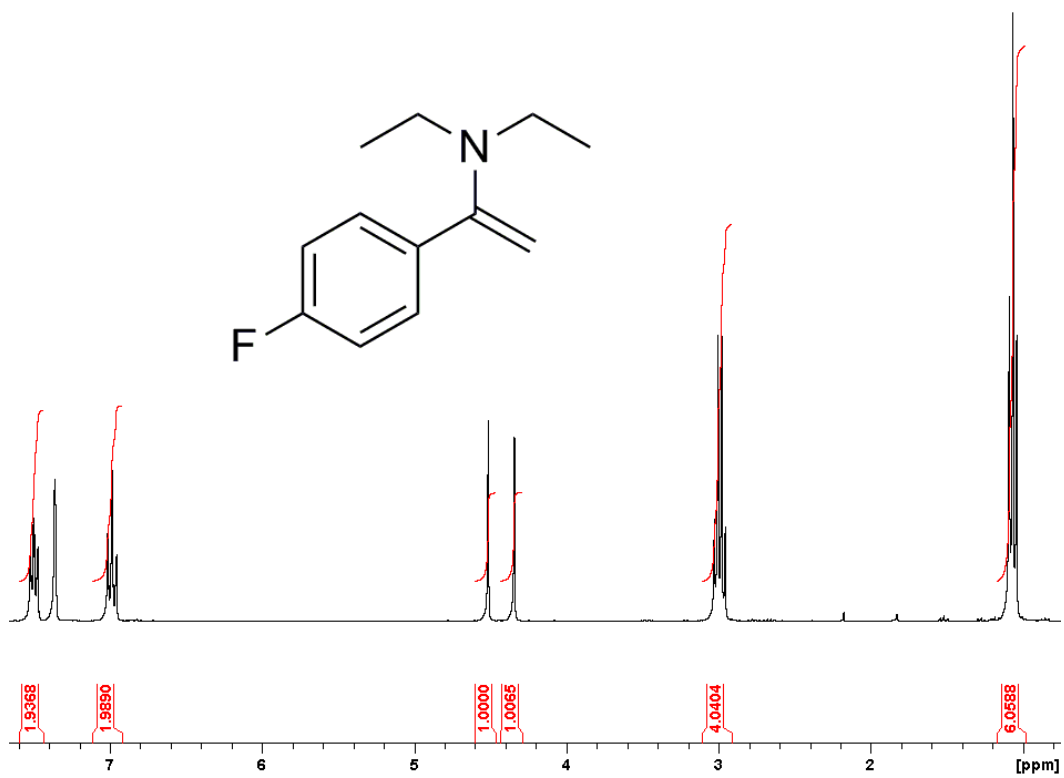

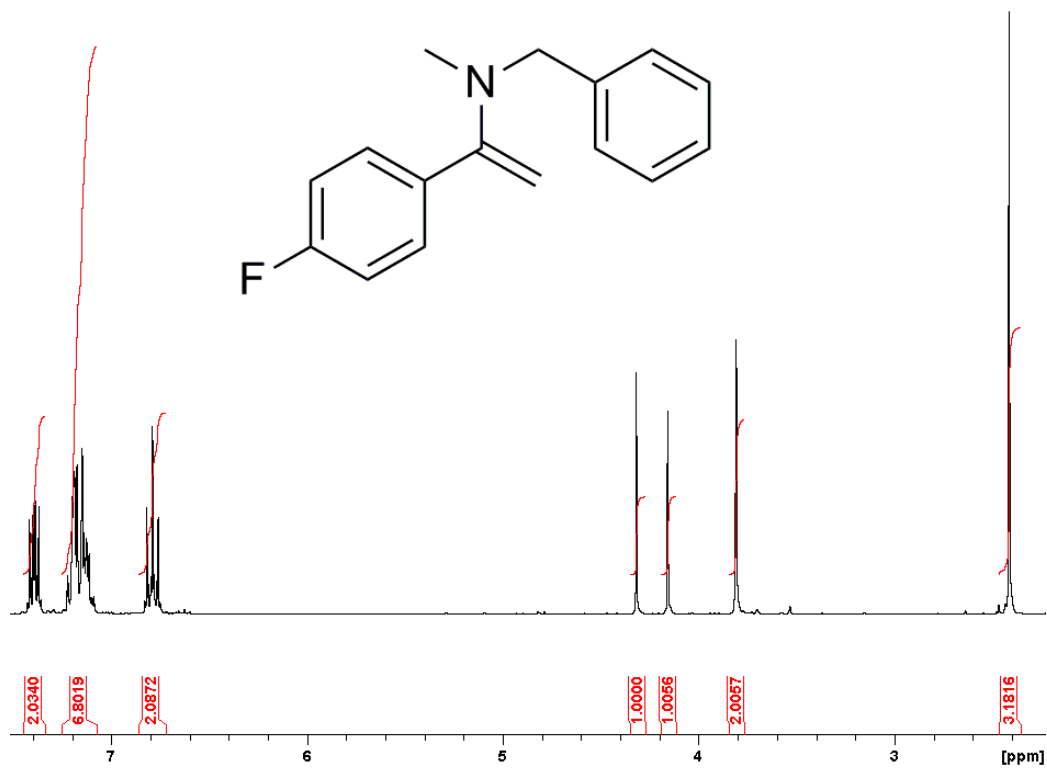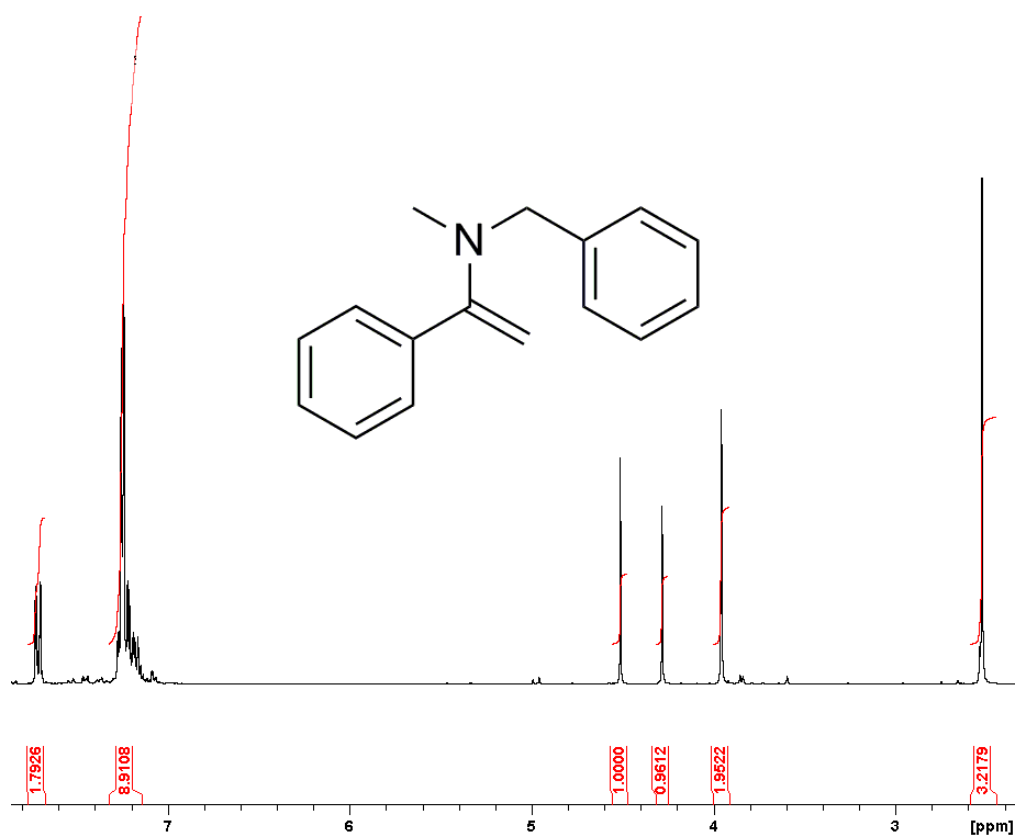

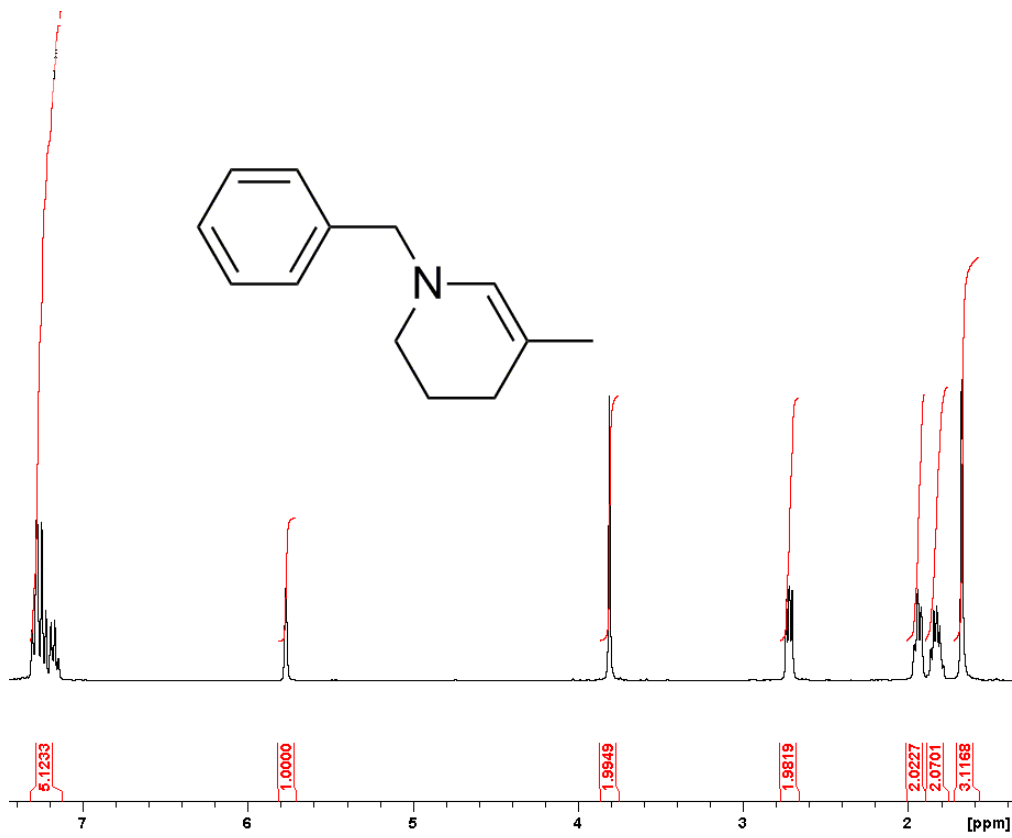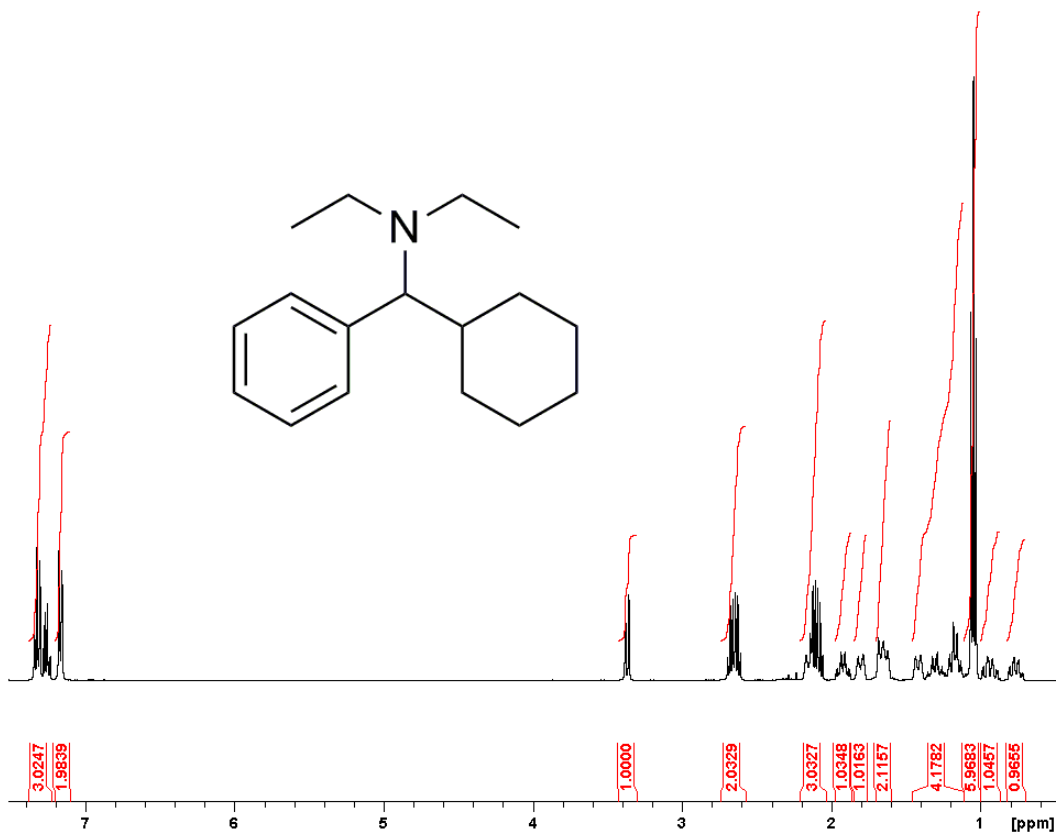



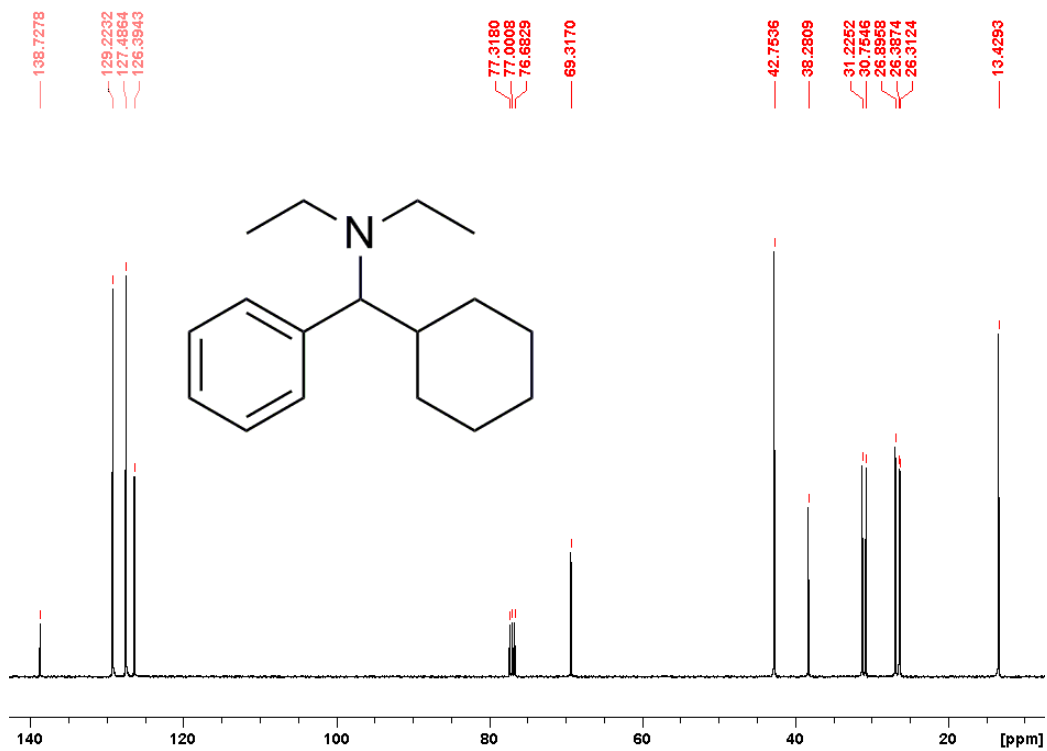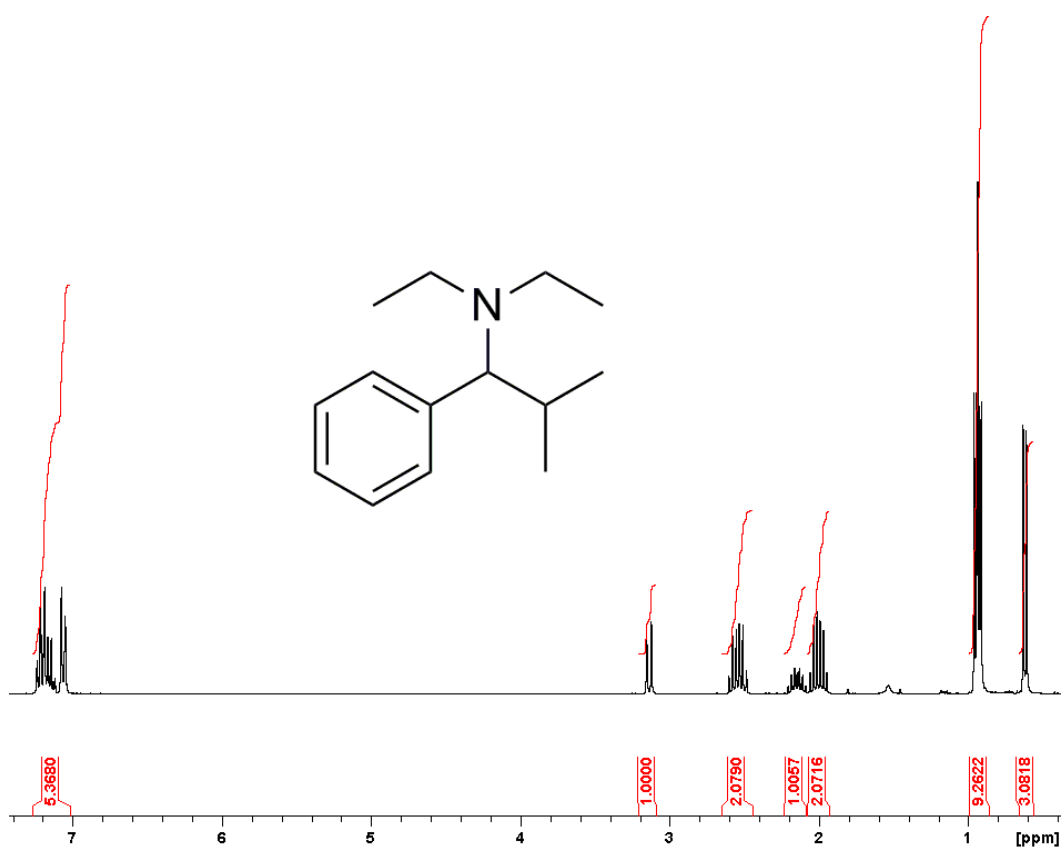

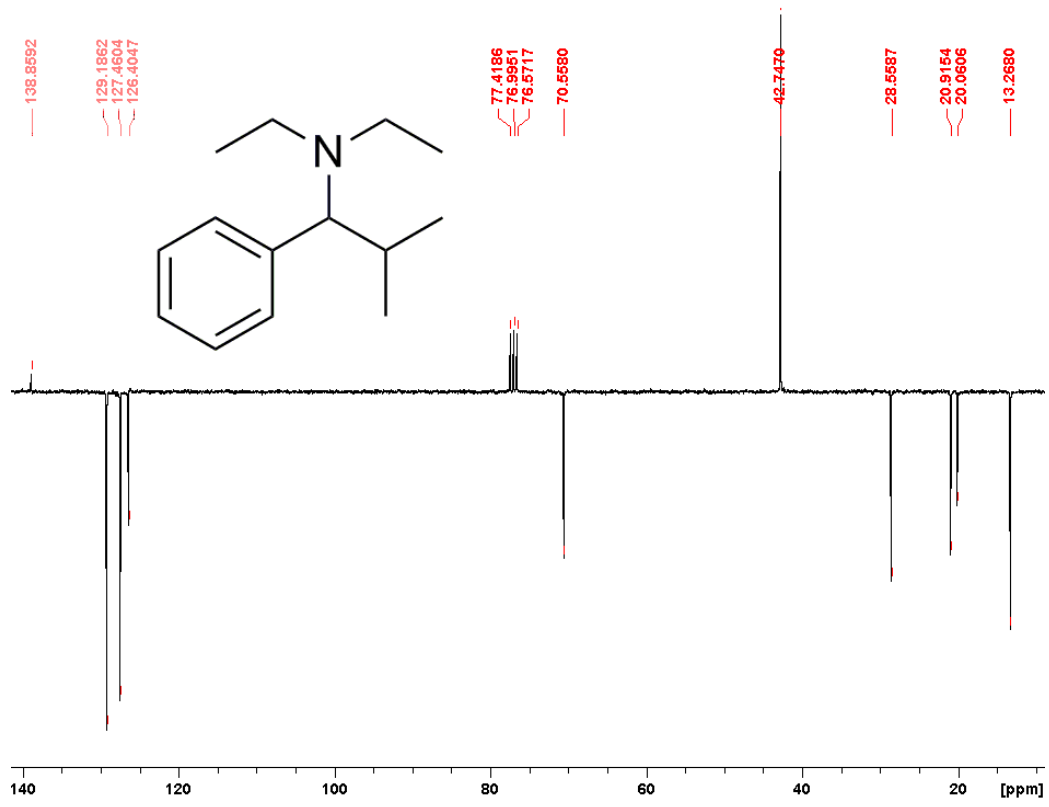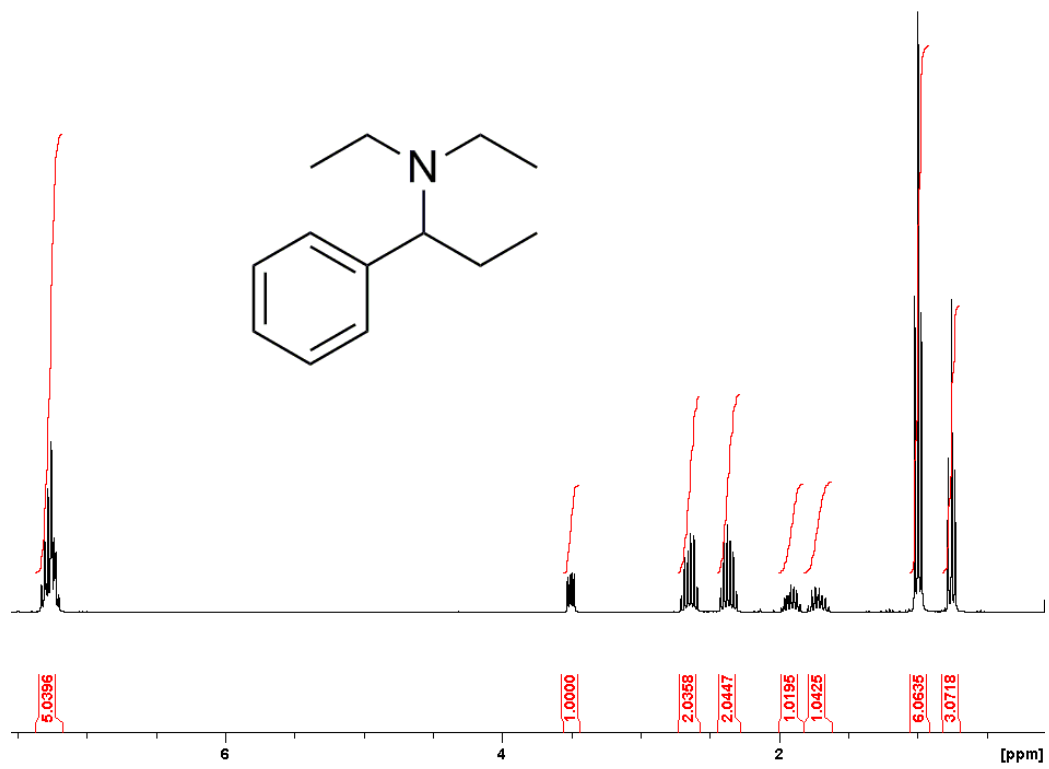

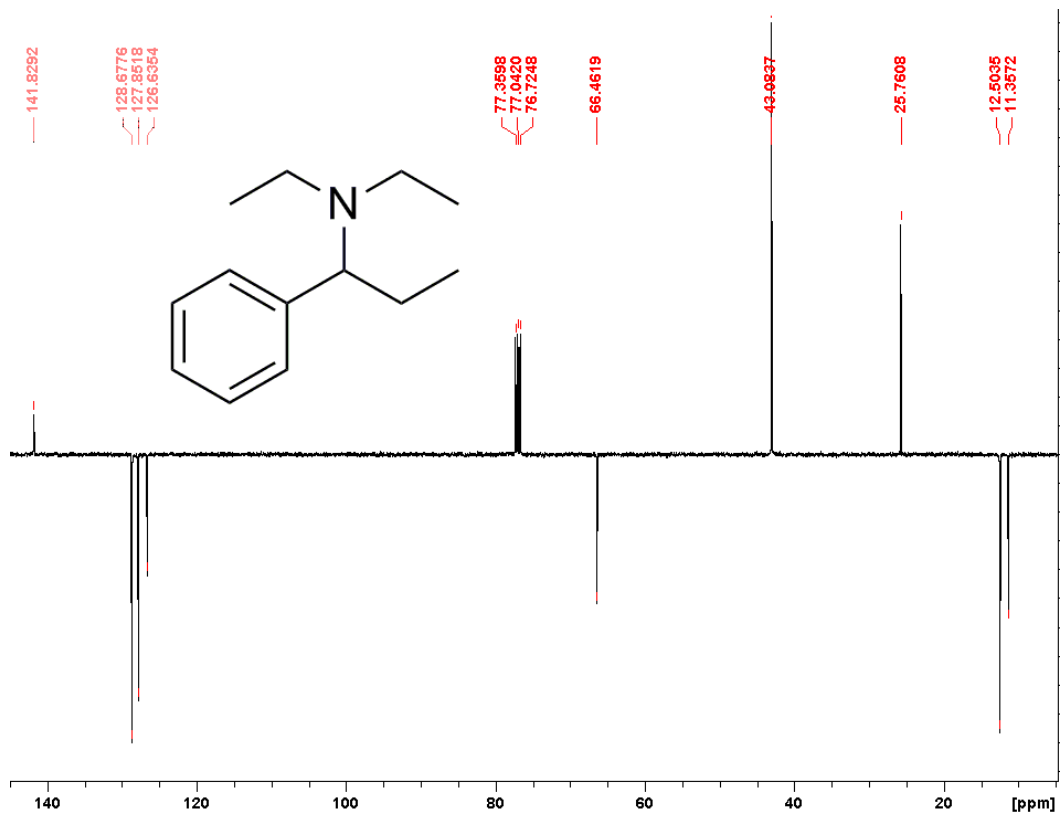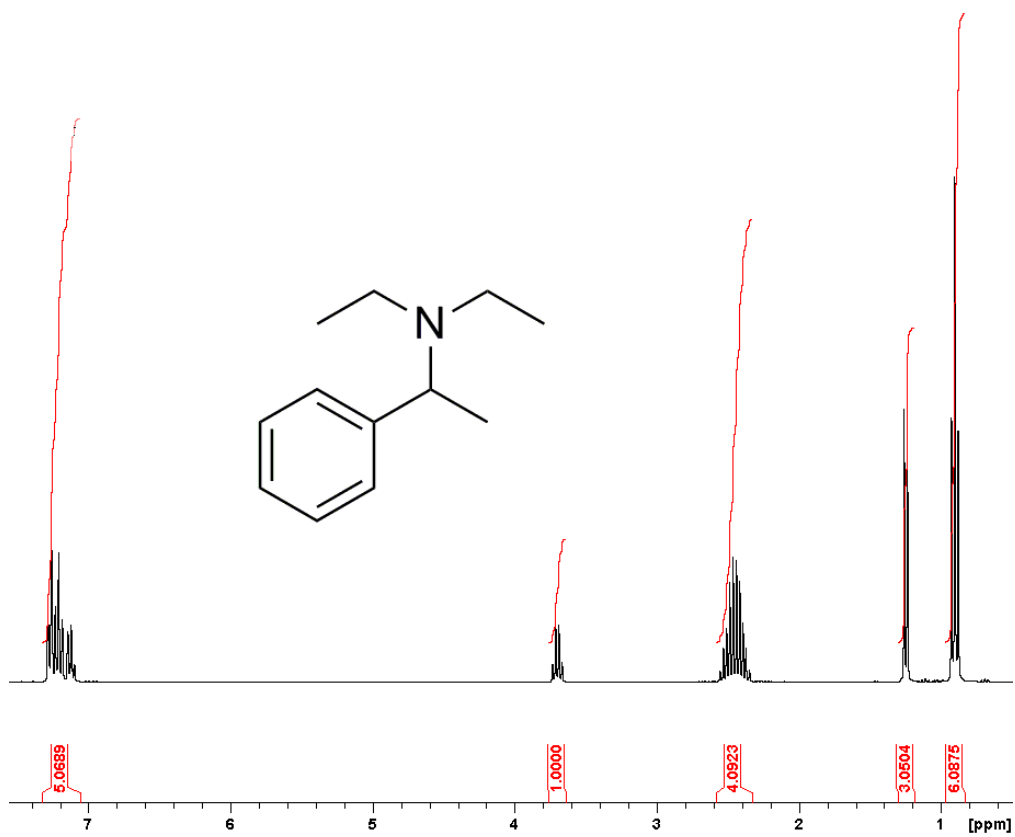

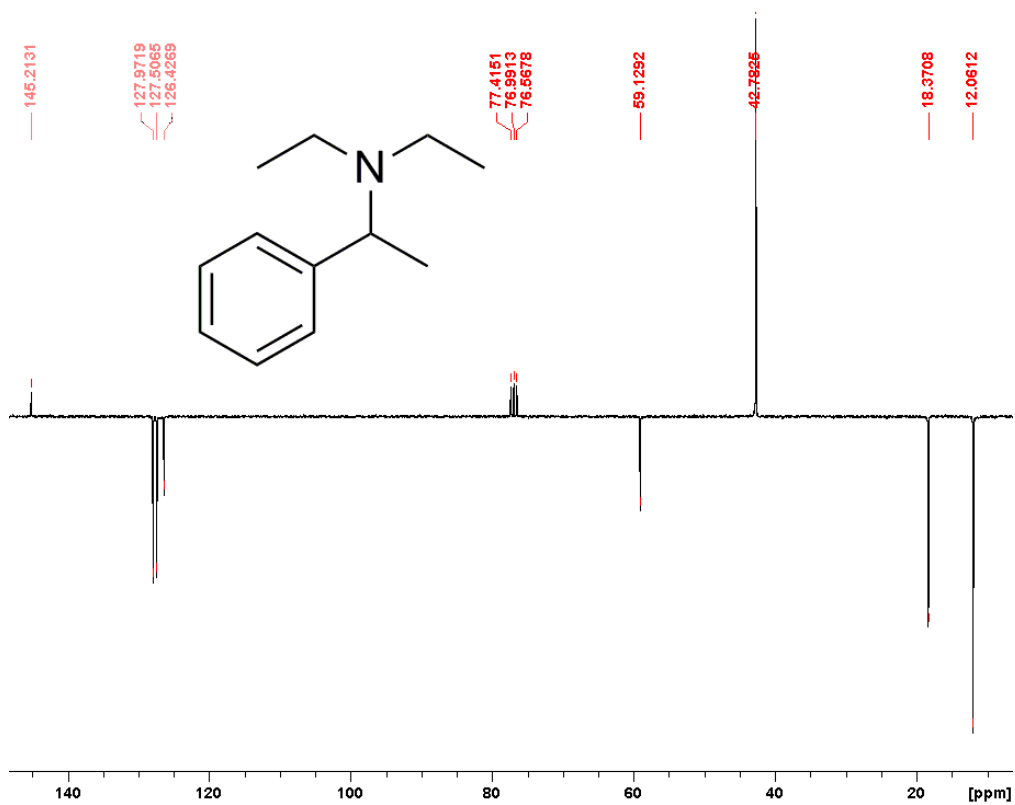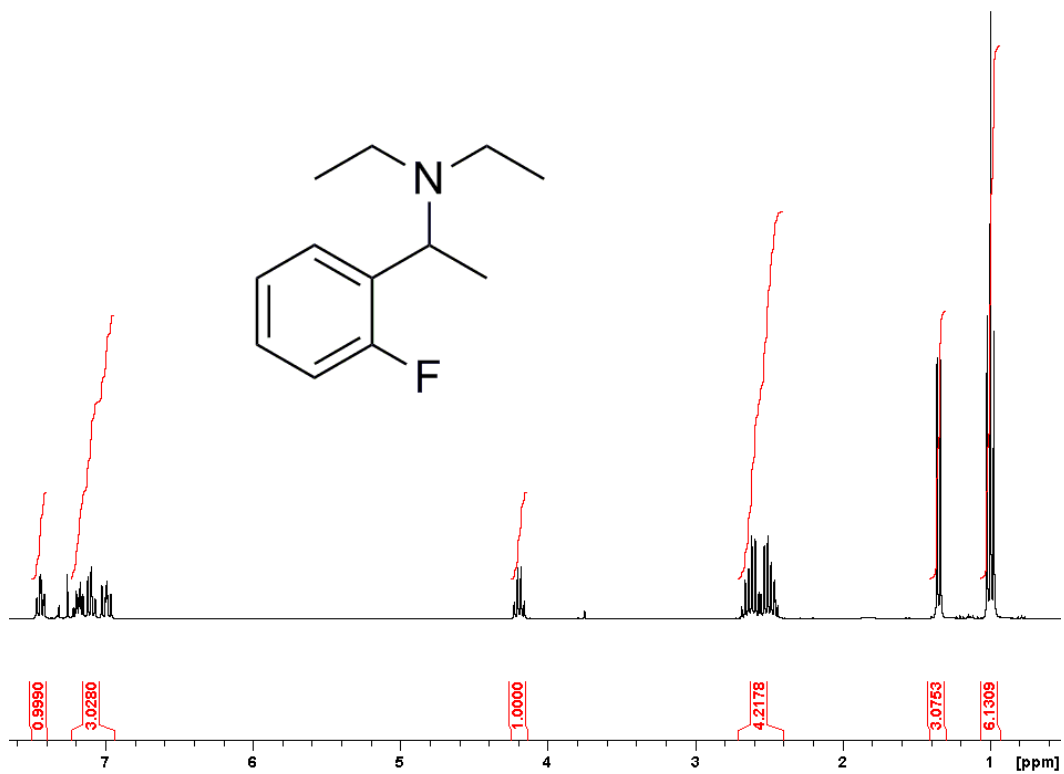

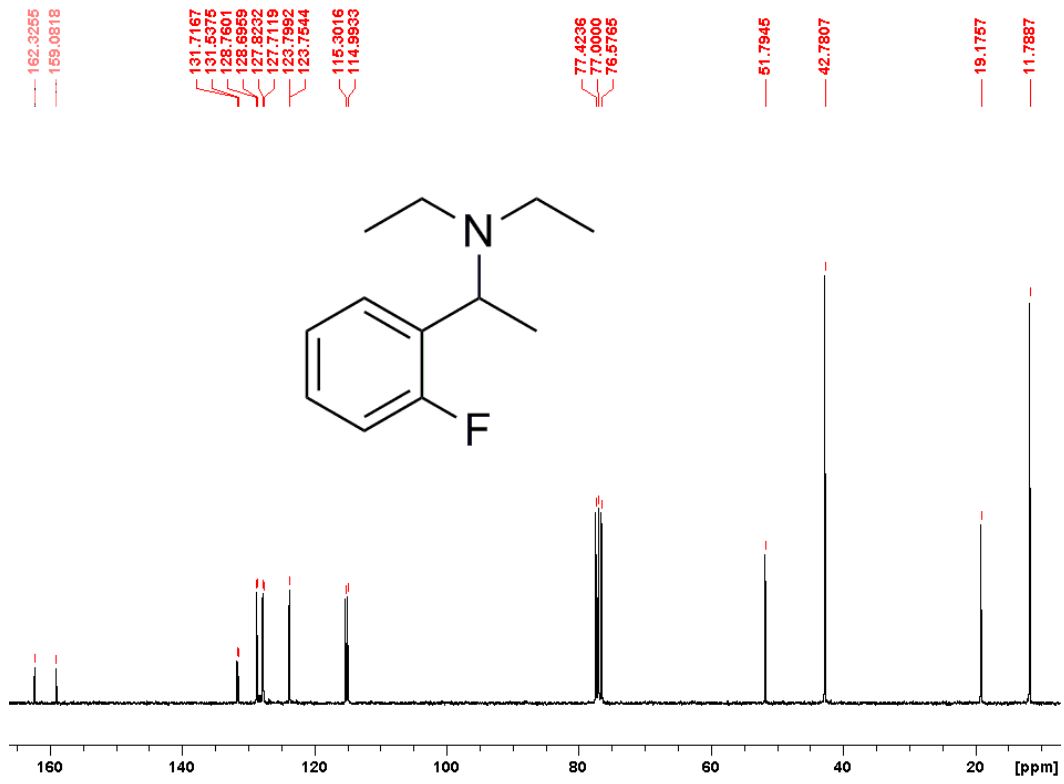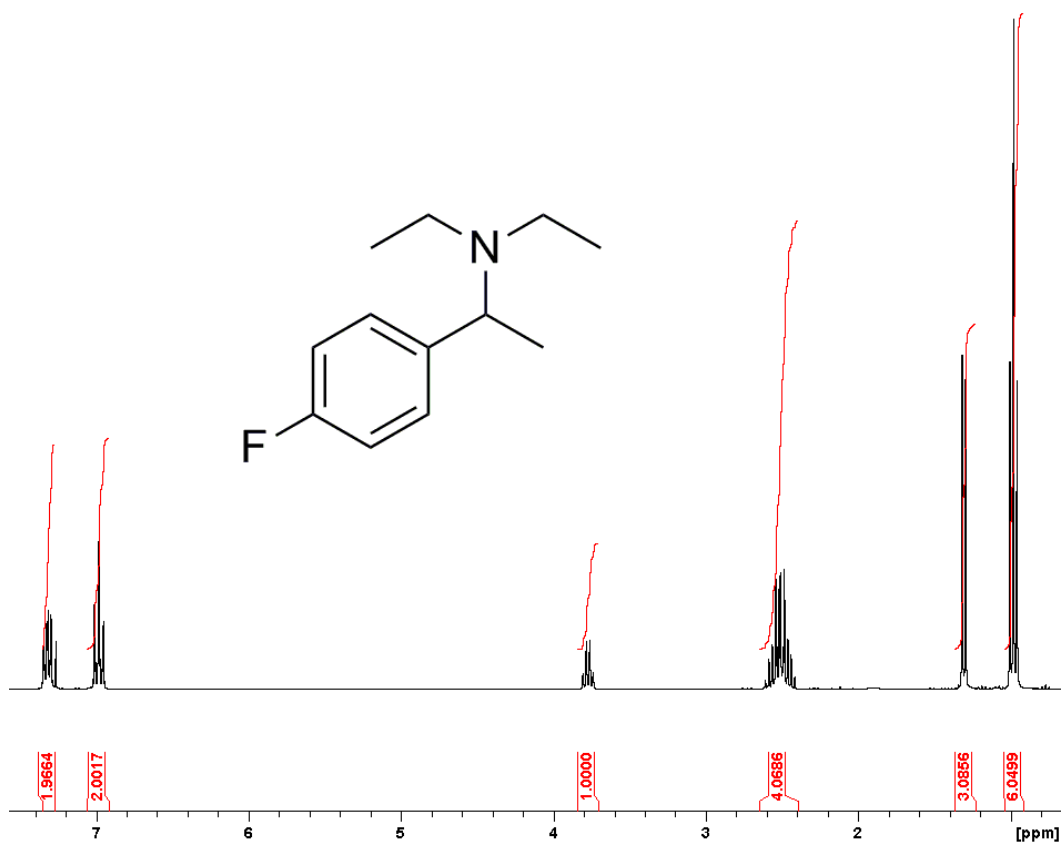

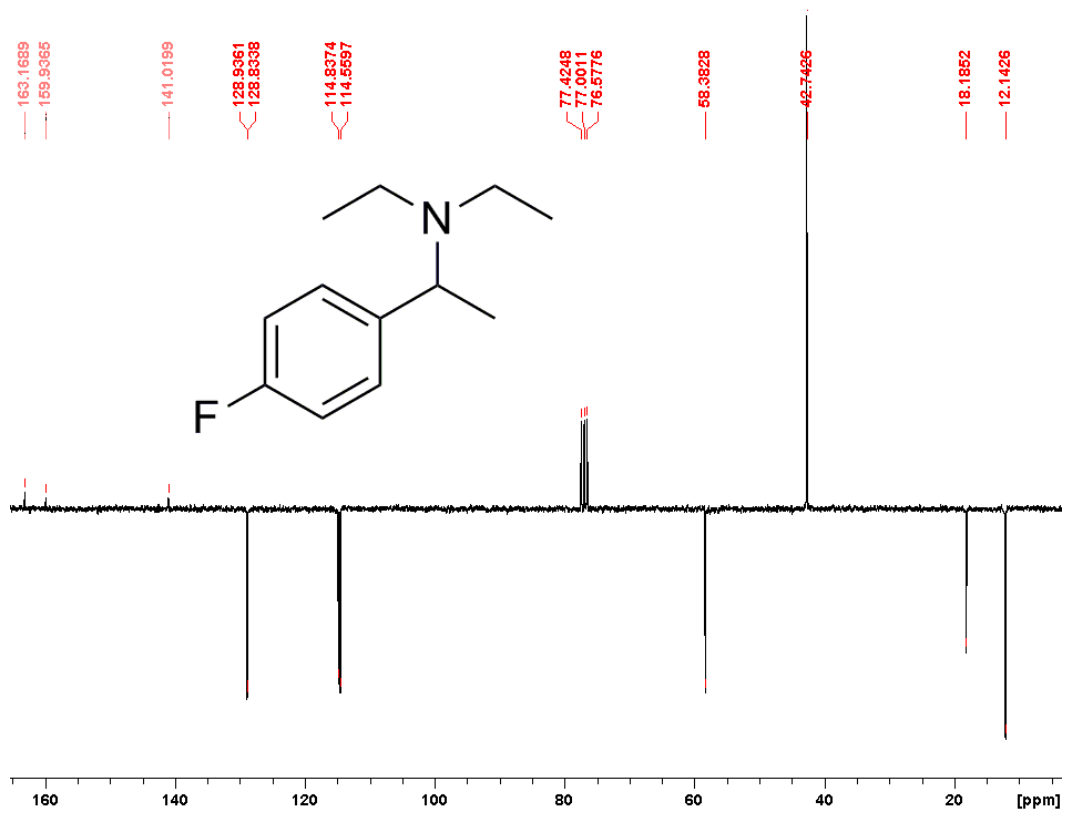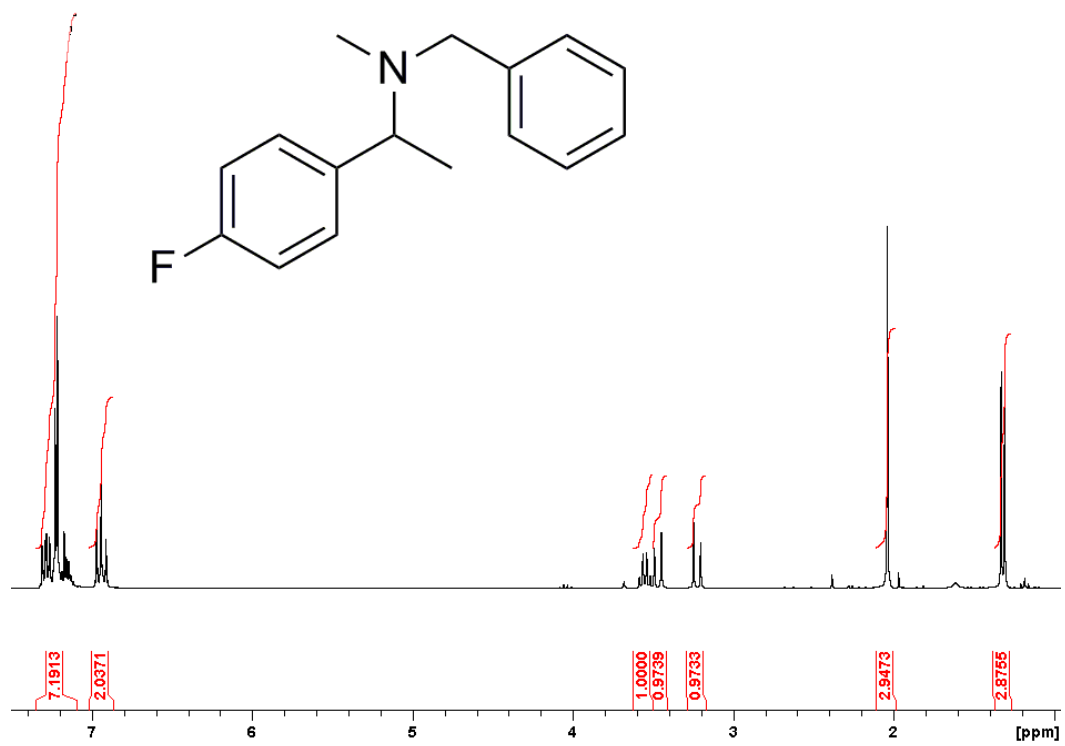

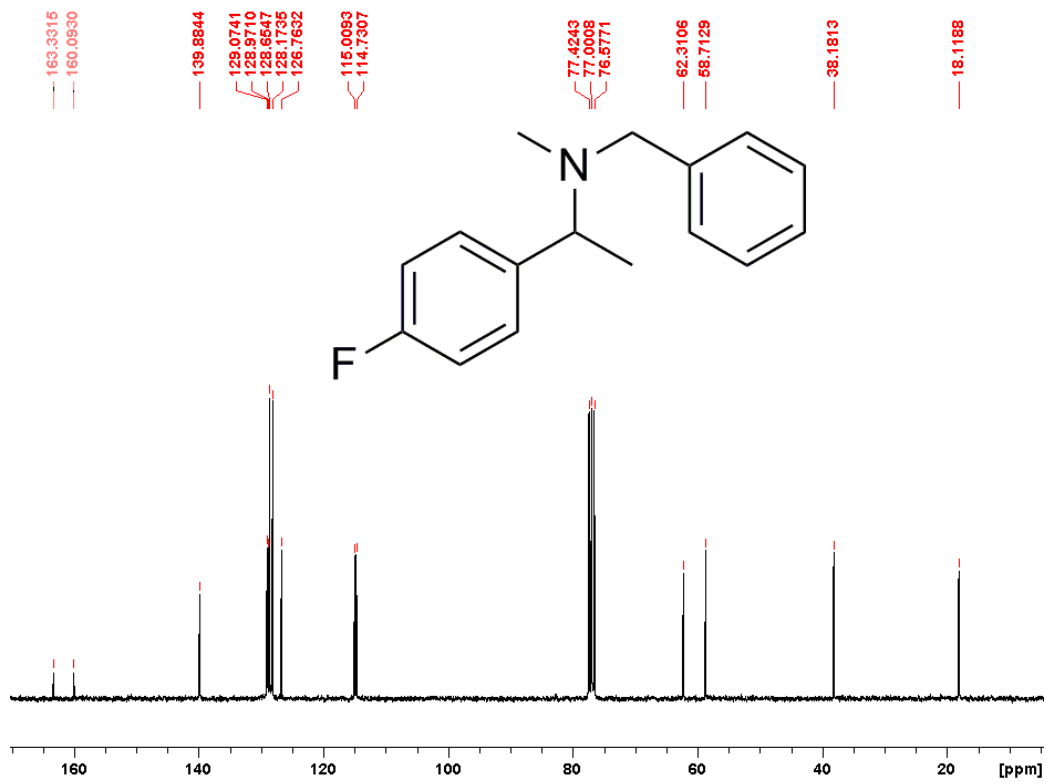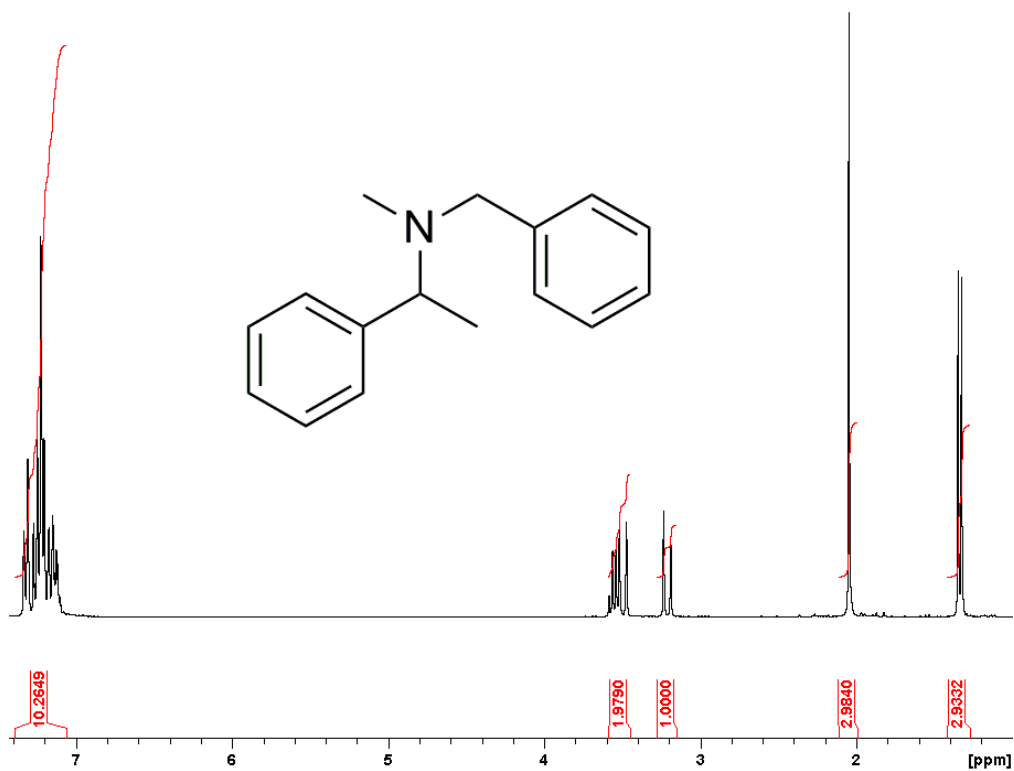

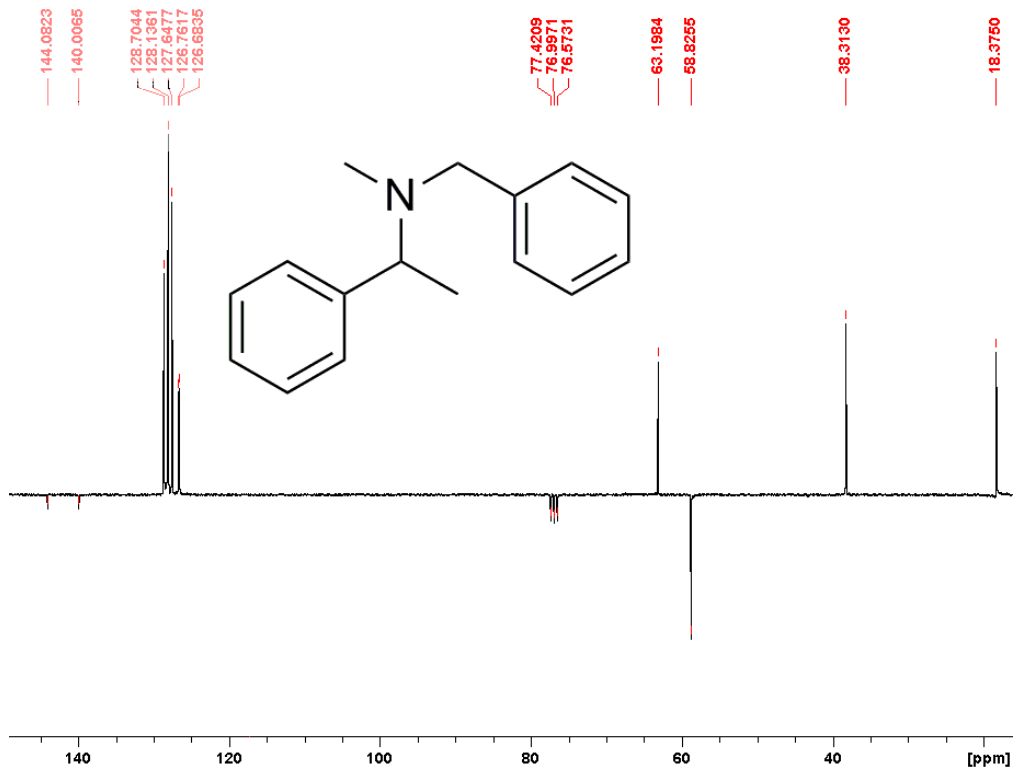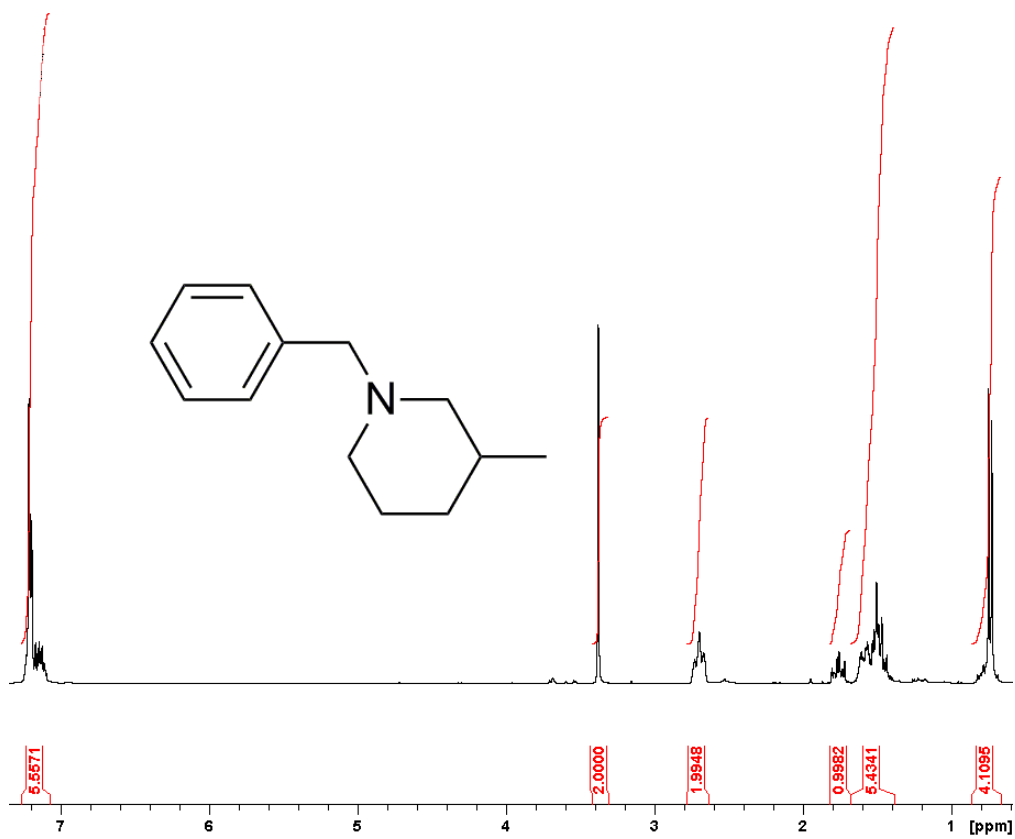



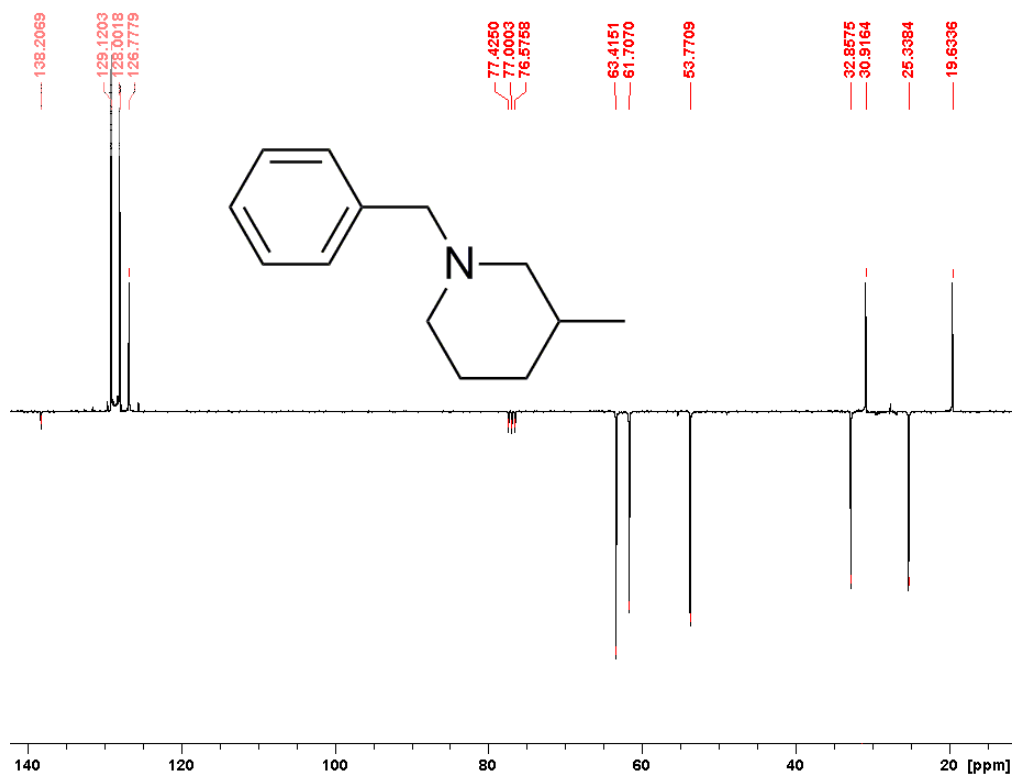

Supplement: Additional file 1 [file 1860-5397-11-70-S1.pdf]
